# Supplementary material for: Cluster-randomised controlled trials of individual and combined water, sanitation, hygiene and nutritional interventions in rural Bangladesh and Kenya: the WASH Benefits study design and rationale
Source: PubMed Central journal article supplement — BMJ Open. 2013 Aug 28;3(8):e003476. doi: 10.1136/bmjopen-2013-003476 (PMC3758977; doi:10.1136/bmjopen-2013-003476), 2013-08-28
Supplement: bmjopen-2013-003476.draft_revisions.pdf [file bmjopen-2013-003476.draft_revisions.pdf]

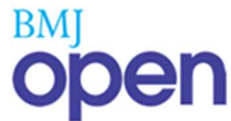

**Cluster-randomized controlled trials of individual and combined water, sanitation, hygiene, and nutritional interventions in rural Bangladesh and Kenya: The WASH Benefits Study design and rationale**

|                               |                                                                                                                                                                                                                                                                                                                                                                                                                                                                                                                                                                                                                                                                                                                                                                                                                                                                                                                                                                                                                                                                                                                                                                                                                                                                                                                                                                                                                                                                                                                                                                                                                                                                                                                                                                                                                                                                                                                                                                                                                                                                                                                                                                                                                                                                                                                                                                                                |
|-------------------------------|------------------------------------------------------------------------------------------------------------------------------------------------------------------------------------------------------------------------------------------------------------------------------------------------------------------------------------------------------------------------------------------------------------------------------------------------------------------------------------------------------------------------------------------------------------------------------------------------------------------------------------------------------------------------------------------------------------------------------------------------------------------------------------------------------------------------------------------------------------------------------------------------------------------------------------------------------------------------------------------------------------------------------------------------------------------------------------------------------------------------------------------------------------------------------------------------------------------------------------------------------------------------------------------------------------------------------------------------------------------------------------------------------------------------------------------------------------------------------------------------------------------------------------------------------------------------------------------------------------------------------------------------------------------------------------------------------------------------------------------------------------------------------------------------------------------------------------------------------------------------------------------------------------------------------------------------------------------------------------------------------------------------------------------------------------------------------------------------------------------------------------------------------------------------------------------------------------------------------------------------------------------------------------------------------------------------------------------------------------------------------------------------|
| Journal:                      | <i>BMJ Open</i>                                                                                                                                                                                                                                                                                                                                                                                                                                                                                                                                                                                                                                                                                                                                                                                                                                                                                                                                                                                                                                                                                                                                                                                                                                                                                                                                                                                                                                                                                                                                                                                                                                                                                                                                                                                                                                                                                                                                                                                                                                                                                                                                                                                                                                                                                                                                                                                |
| Manuscript ID:                | bmjopen-2013-003476                                                                                                                                                                                                                                                                                                                                                                                                                                                                                                                                                                                                                                                                                                                                                                                                                                                                                                                                                                                                                                                                                                                                                                                                                                                                                                                                                                                                                                                                                                                                                                                                                                                                                                                                                                                                                                                                                                                                                                                                                                                                                                                                                                                                                                                                                                                                                                            |
| Article Type:                 | Protocol                                                                                                                                                                                                                                                                                                                                                                                                                                                                                                                                                                                                                                                                                                                                                                                                                                                                                                                                                                                                                                                                                                                                                                                                                                                                                                                                                                                                                                                                                                                                                                                                                                                                                                                                                                                                                                                                                                                                                                                                                                                                                                                                                                                                                                                                                                                                                                                       |
| Date Submitted by the Author: | 25-Jun-2013                                                                                                                                                                                                                                                                                                                                                                                                                                                                                                                                                                                                                                                                                                                                                                                                                                                                                                                                                                                                                                                                                                                                                                                                                                                                                                                                                                                                                                                                                                                                                                                                                                                                                                                                                                                                                                                                                                                                                                                                                                                                                                                                                                                                                                                                                                                                                                                    |
| Complete List of Authors:     | <p>Arnold, Benjamin; University of California, Berkeley, School of Public Health<br/> Null, Clair; Emory University, Rollins School of Public Health; Innovations for Poverty Action,<br/> Luby, Stephen; International Centre for Diarrhoeal Disease Research, Centre for Communicable Diseases; Stanford University,<br/> Unicomb, Leanne; International Centre for Diarrhoeal Disease Research, Centre for Communicable Diseases<br/> Stewart, Christine; University of California, Davis, Program in International and Community Nutrition<br/> Dewey, Kathryn; University of California, Davis, Program in International and Community Nutrition<br/> Ahmed, Tahmeed; International Centre for Diarrhoeal Disease Research, Centre for Nutrition &amp; Food Security; BRAC University, James P. Grant School of Public Health<br/> Ashraf, Sania; International Centre for Diarrhoeal Disease Research, Centre for Communicable Diseases<br/> Christensen, Garret; Swarthmore College, Department of Economics; Innovations for Poverty Action,<br/> Clasen, Thomas; Emory University, Rollins School of Public Health<br/> Dentz, Holly; Emory University, Rollins School of Public Health; Innovations for Poverty Action,<br/> Fernald, Lia; University of California, Berkeley, School of Public Health<br/> Haque, Rashidul; International Centre for Diarrhoeal Disease Research, Centre for Communicable Diseases; International Centre for Diarrhoeal Disease Research, Centre for Vaccine Sciences<br/> Hubbard, Alan; University of California, Berkeley, School of Public Health<br/> Kariger, Patricia; University of California, Berkeley, School of Public Health<br/> Leontsini, Elli; Johns Hopkins Bloomberg School of Public Health, Department of International Health<br/> Lin, Audrie; University of California, Berkeley, School of Public Health<br/> Njenga, Sammy; Kenya Medical Research Institute, Eastern &amp; Southern Africa Centre of International Parasite Control<br/> Pickering, Amy; Stanford University, Civil and Environmental Engineering<br/> Ram, Pavani; State University of New York at Buffalo, School of Public Health and Health Professions<br/> Tofail, Fahmida; International Centre for Diarrhoeal Disease Research, Centre for Nutrition &amp; Food Security<br/> Winch, Peter; Johns Hopkins Bloomberg School of Public Health,</p> |

1  
2  
3  
4  
5  
6  
7  
8  
9  
10  
11  
12  
13  
14  
15  
16  
17  
18  
19  
20  
21  
22  
23  
24  
25  
26  
27  
28  
29  
30  
31  
32  
33  
34  
35  
36  
37  
38  
39  
40  
41  
42  
43  
44  
45  
46  
47  
48  
49  
50  
51  
52  
53  
54  
55  
56  
57  
58  
59  
60

|                                    |                                                                                                                  |
|------------------------------------|------------------------------------------------------------------------------------------------------------------|
|                                    | Department of International Health<br>Colford, John; University of California, Berkeley, School of Public Health |
| <b>Primary Subject Heading</b> :   | Infectious diseases                                                                                              |
| <b>Secondary Subject Heading</b> : | Global health, Nutrition and metabolism, Paediatrics                                                             |
| <b>Keywords</b> :                  | Drinking Water, Sanitation, Handwashing, Nutrition < TROPICAL MEDICINE                                           |
|                                    |                                                                                                                  |

SCHOLARONE™  
Manuscripts

For peer review only

Title:

Cluster-randomized controlled trials of individual and combined water, sanitation, hygiene, and nutritional interventions in rural Bangladesh and Kenya: The WASH Benefits Study design and rationale

Corresponding Author:

Benjamin F. Arnold, PhD  
101 Haviland Hall, MC 7358  
Division of Epidemiology  
School of Public Health  
University of California, Berkeley  
Email: [benarnold@berkeley.edu](mailto:benarnold@berkeley.edu)  
Phone: +1 (510) 214 - 2787

Authors and affiliations:

Benjamin F. Arnold, School of Public Health, University of California, Berkeley  
Clair Null, Rollins School of Public Health, Emory University and Innovations for Poverty Action  
Stephen P. Luby, Centre for Communicable Diseases, International Centre for Diarrhoeal Disease Research, Bangladesh and Stanford University  
Leanne Unicomb, Centre for Communicable Diseases, International Centre for Diarrhoeal Disease Research  
Christine P. Stewart, Program in International and Community Nutrition, University of California, Davis  
Kathryn G. Dewey, Program in International and Community Nutrition, University of California, Davis  
Tahmeed Ahmed,\* Centre for Nutrition & Food Security, International Centre for Diarrhoeal Disease Research, Bangladesh and James P. Grant School of Public Health, BRAC University, Bangladesh  
Sania Ashraf,\* Centre for Communicable Diseases, International Centre for Diarrhoeal Disease Research, Bangladesh  
Garret Christensen,\* Department of Economics, Swarthmore College and Innovations for Poverty Action  
Thomas Clasen,\* Rollins School of Public Health, Emory University  
Holly N. Dentz,\* Rollins School of Public Health, Emory University and Innovations for Poverty Action  
Lia C. H. Fernald,\* School of Public Health, University of California, Berkeley  
Rashidul Haque,\* Centre for Communicable Diseases and Centre for Vaccine Sciences, International Centre for Diarrhoeal Disease Research, Bangladesh  
Alan E. Hubbard,\* School of Public Health, University of California, Berkeley  
Patricia Kariger,\* School of Public Health, University of California, Berkeley  
Elli Leontsini,\* Department of International Health, Johns Hopkins Bloomberg School of Public Health  
Audrie Lin,\* School of Public Health, University of California, Berkeley  
Sammy M. Njenga,\* Eastern & Southern Africa Centre of International Parasite Control, Kenya Medical Research Institute  
Amy J. Pickering,\* Civil and Environmental Engineering, Stanford University  
Pavani K. Ram,\* School of Public Health and Health Professions, State University of New York at Buffalo  
Fahmida Tofail,\* Centre for Nutrition & Food Security, International Centre for Diarrhoeal Disease Research  
Peter J. Winch,\* Department of International Health, Johns Hopkins Bloomberg School of Public Health  
John M. Colford, Jr, School of Public Health, University of California, Berkeley

\* Listed alphabetically

MeSH Key Words:

Drinking Water, Sanitation, Handwashing, Nutrition

Word Counts:

Abstract (293); Main text (9152)

## ABSTRACT

**Introduction:** Enteric infections are common during the first years of life in low-income countries and contribute to growth faltering with long-term impairment of health and development. Water quality, sanitation, handwashing, and nutritional interventions can independently reduce enteric infections and growth faltering. There is little evidence that directly compares the effects of these individual- and combined- interventions on diarrhea and growth when delivered to infants and young children. The objective of the WASH Benefits study is to help fill this knowledge gap.

**Methods and Analysis:** WASH Benefits includes two cluster-randomized trials to assess improvements in water quality, sanitation, handwashing, and child nutrition – alone and in combination – to rural households with pregnant women in Kenya and Bangladesh. Geographically matched clusters (groups of household compounds in Bangladesh and villages in Kenya) will be randomized to one of six intervention arms or control. Intervention arms include: water quality, sanitation, handwashing, nutrition, combined water+sanitation+handwashing (WSH), and WSH+nutrition. The studies will enroll newborn children (N= 5,760 in Bangladesh, N=8,000 in Kenya) and measure outcomes at 12-months and 24-months after intervention delivery. Primary outcomes include child length-for-age Z-scores and caregiver-reported diarrhea. Secondary outcomes include stunting prevalence, markers of environmental enteropathy, and child development scores (verbal, motor, personal/social). We will estimate unadjusted and adjusted intention-to-treat effects using semi-parametric estimators and permutation tests.

**Ethics and Dissemination:** Study protocols have been reviewed and approved by human subjects review boards at the University of California, Berkeley, Stanford University, The International Centre for Diarrheal Disease Research, Bangladesh, the Kenya Medical Research Institute, and Innovations for Poverty Action. Independent data safety monitoring boards in each

country oversee the trials. This study is funded by a grant from the Bill & Melinda Gates Foundation to the University of California, Berkeley.

**Registration:** Trial registration identifiers (www.clinicaltrials.gov): NCT01590095, NCT01704105.

For peer review only

## INTRODUCTION

Together, inadequate drinking water quality, sanitation, hygiene (WASH), and nutrition are leading risk factors for morbidity and mortality among children < 5 y.<sup>1</sup> Despite substantive progress spurred by the Millennium Development Goals to reduce these poverty-related risks, millions of children are born each year into environmental conditions that hinder their ability to achieve their full potential. Repeated insults from infection and undernutrition in the first years of life are thought to have profound negative consequences for health, cognitive development, and human capital that span the life course.<sup>2-4</sup>

The WASH Benefits study includes cluster randomized trials in Bangladesh and Kenya to address three important research questions related to the early life impacts of WASH and nutritional interventions. The first question is whether WASH and nutritional interventions can prevent linear growth faltering in the first two years of life. The second question is whether greater reductions in diarrhea can be achieved by combining individual WASH interventions compared to delivering them in isolation. The third question is whether the combined WASH and nutritional interventions jointly reduce diarrhea or improve linear growth more than each component alone. Below, we briefly summarize the rationale for the conduct of randomized trials to address each of these areas of scientific uncertainty.

### **Question 1: Can WASH and nutritional interventions prevent early life linear growth faltering?**

Children in low-income countries experience severe linear growth faltering in the first 18-24 months of life that is thought to be preventable, at least in part, by postnatal interventions.<sup>5,6</sup> Interventions designed to improve nutrition among very young children measure length-for-age because it is a reliable, objective measure associated with subsequent child development at older ages.<sup>7</sup> During this early window, undernutrition and infection likely influence child

1  
2  
3 development and human capital through additional pathways besides linear growth.<sup>8–10</sup>

4  
5 Unfortunately, measuring child development at very young ages is difficult,<sup>11</sup> and documenting  
6  
7 the full range of intervention impact thus requires longer term follow-up.<sup>4</sup>

8  
9  
10 In the first years of life, intervention trials and observational studies have implicated poor  
11  
12 diet and infectious diseases as likely causes for a large share of child undernutrition.<sup>8,12,13</sup>

13  
14 Interventions to promote breastfeeding, improve complementary feeding practices, or provide  
15  
16 nutritional supplements can lead to small improvements in nutritional indicators and length-for-  
17  
18 age,<sup>14–16</sup> particularly among children who are at highest risk for severe stunting.<sup>17,18</sup>

19  
20  
21 Nevertheless, effects of nutritional interventions on linear growth (upper bound of 95%  
22  
23 confidence interval = +0.79 Z-scores)<sup>19</sup> fall far short of the median growth deficits observed in  
24  
25 Sub-Saharan Africa and Southeast Asia, which are on the order of –2.0 Z-scores.<sup>6</sup>

26  
27  
28 One hypothesis for the inability of nutritional interventions alone to prevent a large share of  
29  
30 growth faltering by age 24 months is that symptomatic and asymptomatic infections are  
31  
32 important contributors to undernutrition. Symptomatic infection is common during the first years  
33  
34 of life in low-income countries: on average, children under 24 months suffer from 3 to 4  
35  
36 episodes of acute diarrhea each year;<sup>20</sup> respiratory infections and other infectious diseases,  
37  
38 such as malaria, are also common in many settings. Observational studies show that repeated  
39  
40 episodes of diarrhea or parasitic infection are associated with increased risk of stunting<sup>8,21–27</sup>  
41  
42 and subsequent cognitive deficits in childhood and later in life.<sup>4,28,29</sup> Possible mechanisms for  
43  
44 enteric infections leading to growth faltering include reduced nutrient absorption through lower  
45  
46 intestinal contact time during episodes of acute diarrhea, greater nutrient losses from persistent  
47  
48 diarrhea (e.g. zinc) or intestinal bleeding (e.g. hookworm infection), reduced appetite, and  
49  
50 diversion of energy and nutrients from growth to the immune system to fight the infection.

51  
52  
53 In addition to symptomatic infection, a subclinical condition called environmental  
54  
55 enteropathy (EE), also known as tropical enteropathy, may also contribute to early life growth  
56  
57 faltering.<sup>30–32</sup> The etiology of EE remains unknown, but the condition is generally characterized

1  
2  
3 by a set of physiologic changes to the small intestine's epithelial layer, which include villus  
4 atrophy, crypt hyperplasia, reduced absorptive capacity, increased permeability and  
5 inflammatory cell infiltration.<sup>33</sup> The causes are most likely related to repeated ingestion of  
6 pathogenic bacteria and an altered composition of the intestinal microbiota, which together lead  
7 to chronic enteric inflammation.<sup>32</sup> Children with EE are thought to have impaired growth through  
8 two mechanisms: (i) reduced nutrient absorption due to decreased surface area in the small  
9 (upper) intestine and (ii) elevated intestinal permeability, which increases translocation of  
10 antigenic molecules that stimulate the immune system and divert energy from growth. The  
11 combined effect of these two processes may harm a child's ability to effectively utilize nutrients  
12 in her existing diet for growth and development. EE is thought to be highly prevalent in low-  
13 income countries<sup>34</sup> and develops early in life: by age 8 months, 95% of a birth cohort in The  
14 Gambia showed signs of EE, and on average children in the cohort exhibited signs of EE during  
15 75% of their first year of life.<sup>31</sup> Studies of Peace Corps volunteers and immigrant populations  
16 have demonstrated that intestinal malabsorption and permeability typically return to normal  
17 levels within 1-2 years after individuals move from highly contaminated environments to cleaner  
18 environments.<sup>35,36</sup> Since community-based studies that measure intestinal structure through  
19 biopsies would be extremely difficult, investigators typically rely on biomarkers of intestinal  
20 permeability, inflammation, and immune system stimulation as measures of subclinical  
21 EE.<sup>31,37,38</sup>

22  
23 It is possible that improved nutrition alone can reduce the negative effects of a limited  
24 number of episodes of infection on growth due to the improved ability of better-nourished  
25 children to fight off enteric infections and exhibit catch-up growth during the convalescent  
26 period.<sup>21,28,39-42</sup> Effective nutritional interventions may be able to prevent or shorten the duration  
27 of EE via several mechanisms, such as a) strengthening epithelial barrier integrity and the  
28 immune response, b) compensating for malabsorption, reallocation or losses of key nutrients  
29 during infection, c) accelerating gut repair following infection, and d) favoring the growth of  
30



1  
2  
3 beneficial gut microorganisms.<sup>39</sup> While it is possible that nutritional interventions alone may  
4 prevent or shorten the duration of EE, the limited evidence to date has been mixed,<sup>33</sup> with some  
5 evidence for improvements in gut function following vitamin A,<sup>43</sup> alanyl-glutamine  
6 supplementation<sup>44</sup> and zinc supplementation,<sup>45,46</sup> but no evidence for gut function improvement  
7 in trials that delivered probiotics,<sup>47</sup> glutamine supplementation,<sup>48</sup> omega-3 fatty acids<sup>49</sup> or richly  
8 fortified complementary foods.<sup>50</sup> As noted above, in many studies nutritional interventions have  
9 been insufficient to completely prevent growth faltering in low-income populations, and in the  
10 context of repeated or chronic infection, improved nutrition may only be able to mitigate – but  
11 not necessarily overcome – some of the effects of enteric infection on growth. If acute infections  
12 and subclinical EE contribute significantly to growth faltering, then interventions to reduce  
13 enteric infections during the first years of life would be expected to improve linear growth,  
14 perhaps independently of nutritional interventions.  
15  
16  
17  
18  
19

20  
21 Unlike the large literature on child nutritional interventions, we are aware of just 10 studies to  
22 measure the effect of WASH interventions on child growth; a forthcoming systematic review<sup>51</sup>  
23 may identify more. Four studies have found no improvement in linear growth as a result of  
24 WASH interventions, despite demonstrating reductions in caregiver-reported diarrhea in most  
25 cases.<sup>9,52–56</sup> A small randomized trial that enrolled children < 12 months and delivered  
26 handwashing promotion in Kathmandu slums additionally found no improvements in EE  
27 biomarkers.<sup>53</sup> The authors hypothesized that handwashing alone was inadequate to clean up  
28 the slum environment sufficiently to change the intestinal physiology, and suggested that more  
29 comprehensive environmental improvements may be necessary to reduce EE and improve  
30 growth.  
31  
32  
33  
34  
35  
36  
37  
38  
39

40  
41 Six studies have found positive associations between improved WASH conditions and child  
42 growth. Multiple cross-sectional or case-control studies found that young children living in  
43 households with improved sanitation and water supply had better linear growth.<sup>57,26,58</sup> A  
44 prospective birth cohort study in peri-urban Peru found that children living in households with  
45  
46  
47  
48  
49  
50

1  
2  
3 home water supply and sewerage connections were 1cm taller by age 24 months compared to  
4 children in households without them, and the effects of water supply and sewerage conditions  
5 were not mediated entirely by reductions in diarrhea.<sup>59</sup> A water quality intervention trial in rural  
6 Kenya found an average linear growth increase of 0.8 cm among children <5 years old after 1  
7 year of exposure.<sup>60-62</sup> A prospective cohort from rural Bangladesh enrolled in a pilot for this  
8 study found that children raised in households with improved sanitation, hygiene, and water  
9 quality conditions had lower levels of parasite infection, better growth, and improved EE  
10 biomarkers compared to children raised in households without such access.<sup>63</sup> A trial to assess  
11 the impact of rural sanitation on diarrhea includes length-for-age as a secondary outcome but is  
12 still underway.<sup>64</sup> Taken together, the mixed evidence to date does not conclusively link improved  
13 WASH conditions with improved child growth, and the field would benefit from additional efficacy  
14 studies.  
15  
16  
17  
18  
19  
20  
21  
22  
23  
24  
25  
26  
27  
28  
29  
30  
31

## 32 **Question 2: Are combined WASH interventions more effective than single interventions?**

33  
34 In addition to quantifying the independent effects of WASH interventions, an important  
35 question is whether and how to combine sanitation, water quality, and handwashing promotion  
36 interventions to cost-effectively achieve health gains. Many implementing groups have publicly  
37 embraced the notion that combining interventions to improve water quantity, water quality,  
38 sanitation, and hygiene results in added benefits. This claim is based, in part, on observational  
39 studies<sup>26,58,65,66</sup> and theoretical modeling of pathogen transmission pathways.<sup>67,68</sup> However, the  
40 limited available evidence from randomized trials does not support this approach. In the only  
41 randomized controlled trial specifically designed to evaluate combined interventions, the two  
42 interventions evaluated were point-of-use water treatment and handwashing promotion with  
43 soap; individually, each intervention reduced child diarrhea (51% and 64% reduction), but there  
44 was no additional reduction in diarrhea among children exposed to both interventions (55%  
45 reduction).<sup>54</sup> These findings are consistent with results of a meta analysis of published  
46  
47  
48  
49  
50

1  
2  
3 interventions to improve water quality, sanitation and hygiene, which found that combined  
4  
5 interventions led to no greater reduction in diarrheal disease than single interventions.<sup>69</sup>  
6

7 For WASH programs, single interventions are less expensive and easier to scale than  
8  
9 combined interventions. By complicating communication and behavior change, combined  
10  
11 interventions can potentially diminish the overall effect achievable from a single intervention.<sup>70</sup>  
12  
13 Understanding the marginal benefits of sanitation, water treatment, and handwashing in the  
14  
15 absence and presence of each of the other interventions will therefore be important for policy  
16  
17 makers (i) when deciding overall budgets for sanitation, water, and handwashing, and (ii) when  
18  
19 weighing the tradeoffs between allocating resources to an intense, expensive approach  
20  
21 combining multiple interventions in a single site, or choosing the most cost-effective  
22  
23 interventions and rolling them out at scale. This same reasoning applies to our third research  
24  
25 question, below.  
26  
27  
28  
29

30  
31 **Question 3: Are there larger effects on diarrhea or linear growth from combining a)**  
32  
33 **nutritional interventions with b) a combined water, sanitation and handwashing**  
34  
35 **intervention compared to each component alone?**  
36

37  
38 In the 1960s Scrimshaw et al. proposed a theory that repeated infections interact with poor  
39  
40 nutrition to cause a cycle of infection and malnutrition.<sup>71</sup> Consistent with this earlier work,  
41  
42 McDade<sup>72</sup> outlined a life history theory of immune function in which he posited that infants face  
43  
44 a resource allocation tradeoff between maintenance (fighting infection, physiologic repair) and  
45  
46 growth. During infection, the immune system diverts energy and nutrients away from growth; a  
47  
48 developing infant prioritizes survival and maintenance over growth. When resources are limited,  
49  
50 the absolute level of energy or nutrients available to infants can be a major determinant of  
51  
52 growth and physiologic repair. An impaired gut in a child without access to sufficient energy or  
53  
54 nutrients will further suffer from impaired healing, with subsequent decline in gut function and  
55  
56 nutrient absorption for growth; thus begins a vicious cycle between infection and  
57  
58  
59  
60

malnutrition.<sup>71,73,74</sup> The potential contribution of infection to malnutrition and mortality risk was recently illustrated in a dramatic 35% reduction in all cause mortality among severely malnourished Malawian children after the provision of prophylactic antibiotics.<sup>75</sup>

Dewey and Mayers<sup>39</sup> reviewed the evidence for the potential interaction between nutrition and infection on early child growth. The review identified just one study that suggested that infections could reduce the effectiveness of nutritional interventions and four trials that demonstrated that improved nutrition could limit the negative consequences of infection. The authors concluded that the potential interaction between nutrition and infection control should be a priority for research, which echoes earlier calls for additional research in this area.<sup>33,34</sup> The only study to date that we are aware of that was explicitly designed to test for interaction between infection control and improved nutrition was the Narangwal nutrition project, conducted in Punjab, India between 1968 and 1973.<sup>10,76-78</sup> The 10-village study (2,900 newborns) was a factorial trial that randomized villages to control, improved medical services, improved nutrition, or their combination. The nutrition intervention included growth monitoring, food supplementation for children who were not growing well, and nutrition education. The medical care intervention improved access to vaccines and morbidity surveillance for acute illness. Both nutritional and medical service villages also received prenatal care for pregnant mothers, which included iron and folic acid supplements as well as food supplements for mothers who were underweight. The study found that the medical services intervention improved height and weight compared to control, and that the nutritional services intervention improved height and weight even more. The study found no additional benefit to combining nutrition and medical services above the nutritional services alone with respect to height and weight. Although international guidelines for infant and young child feeding practices published by Unicef, WHO, and the Alive and Thrive initiative all include handwashing recommendations,<sup>79-81</sup> the degree to which additional infection control measures could complement nutrition programs remains an important knowledge gap.

## Objectives of the WASH Benefits Study

Given the likely long-term negative consequences of undernutrition and infection during a child's first years, the global development community would benefit from rigorous evidence about the effects of single- and combined WASH and nutritional interventions on child illness and growth. As outlined above, there remains substantial uncertainty about which interventions or combination of interventions are most effective. The WASH Benefits study includes two highly comparable cluster randomized trials in rural Bangladesh and Kenya to help fill these knowledge gaps. The intervention trials include single and combined interventions in sanitation, water quality, handwashing, and nutrition. Each intervention has been developed over multiple years of formative research. The two trials share the following scientific objectives, which will contribute evidence toward the identified evidence gaps.

### Primary scientific objectives:

1. Measure the impact of sanitation, water quality, handwashing, and nutrition interventions on child diarrhea and linear growth after 2 years of exposure.
2. Determine whether there are larger reductions in child diarrhea when providing a combined water, sanitation and handwashing intervention compared to each component alone.
3. Determine whether there are larger effects on child diarrhea and linear growth from combining a) a comprehensive child nutrition intervention with b) a combined water, sanitation and handwashing intervention compared to each component alone.

### Secondary scientific objectives:

4. Measure the impact of a child nutritional intervention and household environmental interventions on environmental enteropathy biomarkers, and more clearly elucidate this potential pathway between environmental interventions and child growth and development.

1  
2  
3 5. Measure the impact of sanitation, water quality, handwashing and nutritional interventions on  
4  
5  
6  
7  
8  
9  
10  
11  
12  
13  
14  
15  
16  
17  
18  
19  
20  
21  
22  
23  
24  
25  
26  
27  
28  
29  
30  
31  
32  
33  
34  
35  
36  
37  
38  
39  
40  
41  
42  
43  
44  
45  
46  
47  
48  
49  
50  
51  
52  
53  
54  
55  
56  
57  
58  
59  
60

intestinal parasitic infection prevalence and intensity.

6. Measure the association between parasitic infection and other measures of enteric health, including acute diarrhea and environmental enteropathy biomarkers.

To achieve these objectives, the studies will enroll pregnant women and their children who are born within approximately 6 months of the baseline survey. The study will measure linear growth and caregiver-reported diarrhea, biological markers of EE, intestinal parasite infections and child development in the cohort over the first 24 months of exposure to the intervention.

## METHODS AND ANALYSIS

### Overview of the design

The Bangladesh trial is led by the International Center for Diarrheal Disease Research, Bangladesh (icddr,b); the Kenya trial is led by Innovations for Poverty Action (IPA) and the Kenya Medical Research Institute (KEMRI). Both trials include 6 intervention arms and a double-sized control arm (Figure 1). In Bangladesh, the unit of randomization is a group of compounds visited by a single local promoter and separated by at least a 15-minute walk. Bangladesh clusters consist of 8 proximate household compounds that meet our eligibility criteria within a village. In Kenya, clusters consist of one or two adjoining administrative villages with at least 6 eligible pregnant women. The studies enroll pregnant women and their children who are born within approximately 6 months of the baseline survey. We will follow the closed cohort longitudinally and measure primary outcomes at 12 months and 24 months after initiating the intervention.

The design includes a large number of clusters per arm with a small number of children per cluster, which was motivated by three, inter-related considerations: (i) WASH interventions need

1  
2  
3 to be delivered at the cluster level because the promotion activities are inherently community  
4 level; (ii) there are potential interactions between adjacent households with respect to behavior  
5 and infectious disease and we wish to maintain independent units for randomization; and (iii) at  
6 the time our study enrolls a cluster and initiates an intervention, pregnant women are relatively  
7 scarce. The large study population spread over a wide geographic area means that we will  
8 measure intervention effects over heterogeneous environmental conditions.<sup>82</sup> The design is  
9 optimized to measure group-level differences in our primary outcomes. The infrequent  
10 measurements in WASH Benefits will mean that we will not characterize infectious outcomes  
11 (e.g., diarrhea, parasitic infections) well for individual children if the outcomes vary temporally  
12 within children.<sup>83</sup>

## Participant eligibility criteria, study setting, and enrollment strategy

### Participant eligibility criteria

13  
14  
15 In both countries, the trials enroll pregnant women identified in community-based surveys  
16 who expect to deliver in the 6 months following enrollment based on date of last menstruation.  
17 The study will enroll all children born in study clusters in the 6 months following the baseline  
18 survey (some target children will be born after 6 months due to inaccuracies in gestational age  
19 using reported date of last menstruation). Our target sample size of pregnant women at  
20 enrollment is 5,760 in Bangladesh and 8,000 in Kenya. The Kenya cohort will be larger because  
21 we expect to find more variation in child length-for-age than in Bangladesh (sample size details  
22 below). Within study compounds, the study enrolls all children < 36 months at baseline to  
23 measure diarrhea outcomes over the study period; the study measures diarrhea outcomes in a  
24 wider age group because older children are still at high risk for diarrheal disease.<sup>20</sup>

25  
26 In both countries, compounds consist of multiple households (typically 3-10 in Bangladesh,  
27 1-4 in Kenya), usually comprising blood relatives, who share a common courtyard. Compounds  
28 are eligible to participate if (i) they have a pregnant woman and (ii) the woman plans to stay in  
29

1  
2  
3 the village for the next 12 months. The study excludes households who do not own their home  
4  
5 to help mitigate attrition during follow-up. The Kenya trial excludes villages that have chlorine  
6  
7 dispensers at water sources installed by programs separate from the present study. In  
8  
9 Bangladesh, the study excludes households who report high iron in their drinking water most of  
10  
11 the year because pilot studies showed it was difficult to maintain the appropriate chlorine  
12  
13 residual for continued disinfection in high-iron water. In cases where the respondent is unsure  
14  
15 about iron content, field staff check the water's chlorine demand using Aquatabs® and a digital  
16  
17 Hach Pocket Colorimeter II; if residual chlorine is below 0.2 mg/L after 30 minutes staff exclude  
18  
19 the household. Within a study compound, the studies enroll pregnant women and children from  
20  
21 the following age groups:

22  
23 *1) Children in utero at enrollment (target children):* All children born to enrolled mothers  
24  
25 within approximately 6 months of the baseline survey.

26  
27 *2) Children 18 – 27 months old at enrollment (specimen collection):* Older children living in  
28  
29 the compound and aged 18-27 months at enrollment will be eligible for stool and blood  
30  
31 specimen collection. This age window reflects the age window of the target children at the final  
32  
33 study measurement, and serves as a baseline measure for the study population.

34  
35 *3) Children < 36 months at enrollment (diarrhea):* All children < 36 months living in the  
36  
37 compound are eligible for caregiver reported diarrhea measurement.

38  
39 *4) Additional children born into study compounds after 6 months:* We will enroll children born  
40  
41 into study compounds who are too young to meet our enrollment criteria (group 1, above),  
42  
43 deliver interventions to them according to randomized assignment, and measure anthropometry  
44  
45 and diarrhea at follow-up surveys. These additional enrollees will not be included in the primary  
46  
47 analysis because very young children may not be exposed to intervention for sufficient amount  
48  
49 of time to expect to see impact on our primary outcomes (particularly length-for-age). However  
50  
51 the additional young children will provide information (in exploratory analyses) about the effect  
52  
53 of established interventions on very young infants.



1  
2  
3 Field staff discuss the prospect for participation in the study with adults in each compound,  
4 including the mother/caregiver of the target infants. After providing time for discussion among  
5 the compound residents, a member of the field team seeks formal informed consent from  
6 pregnant women.  
7  
8  
9  
10

### 11 12 13 Bangladesh setting and enrollment

14  
15 The Bangladesh trial is located in Gazipur, Mymensingh, and Tangail districts. These 3 districts  
16 are located in the floodplain of central Bangladesh where the majority of the rural population is  
17 engaged in agriculture. The majority of the population uses shallow tubewells for drinking water,  
18 which are known to be frequently contaminated with fecal indicator bacteria.<sup>84</sup> Enrollment  
19 commenced in June 2012. The study has enrolled compounds in communities that meet the  
20 following criteria:  
21

- 22 • Located in a rural area
- 23 • Drinking water with low levels of iron (<1 milligrams/L on average) and arsenic (<50  
24 micrograms/L on average) as documented in the collaborative assessments by the  
25 Government of Bangladesh and the British Geological Survey. Water chemistry eligibility  
26 criteria were used because pilot studies indicated that when iron or arsenic levels were  
27 high the chlorine demand for household water treatment was unpredictable.
- 28 • The Government of Bangladesh, international non-government organizations working in  
29 Bangladesh and local government authorities report that no major water, sanitation, or  
30 focused nutrition programs are currently operating or planned in the area in the next 2  
31 years
- 32 • Not located in haor areas (areas completely submerged during the monsoon season)

33 Each study cluster includes a group of compounds with 8 eligible pregnant women. The  
34 compounds within a cluster are located closely enough together so that a single promoter can  
35  
36  
37  
38  
39  
40  
41  
42  
43  
44  
45  
46  
47  
48  
49  
50

1  
2  
3 reach each of the participating compounds by walking. If the compounds were too dispersed for  
4  
5 a promoter to reach all of them on foot, then they will not be enrolled in the study. More than  
6  
7 one cluster could be enrolled in a single village but clusters within the same village need to be  
8  
9 separated from each other by a minimum of 15 minutes walking distance.  
10  
11

### 12 13 14 Kenya setting and enrollment

15  
16 The Kenya trial is located in rural areas of 10 districts in Bungoma, Kakamega, and Vihiga  
17  
18 counties in the western part of the country. The region is populated mainly by subsistence  
19  
20 farmers. Unimproved latrine coverage is high (at least 85%), and our pilot study in the region  
21  
22 estimated that among children < 27 months old 11% had diarrhea in the preceding two days.  
23  
24 Very few (<5%) households have piped water, and the majority of households report obtaining  
25  
26 drinking water from sources such as protected springs, where chlorination has previously been  
27  
28 shown effective.<sup>85</sup> Enrollment commenced in November 2012. The study region contains over  
29  
30 2,000 villages, from which study villages were selected to form clusters using the following  
31  
32 criteria:  
33  
34

- 35 • Located in a rural area (defined as villages with <25% residents living in rental houses,  
36 <2 gas/petrol stations, and <10 shops)
  - 37 • Not enrolled in ongoing WASH or nutrition programs
  - 38 • Majority (>80%) of households do not have access to piped water into the home
  - 39 • At least 6 eligible pregnant women in the cluster at baseline
- 40  
41  
42  
43  
44  
45  
46  
47  
48  
49  
50

### 51 52 53 Description of the Interventions

#### 54 55 Overview of the intervention approach and assumptions

56  
57 The WASH Benefits study has focused on identifying and testing water, sanitation,  
58  
59 handwashing and nutritional interventions that have strong potential to reduce infection and  
60

malnutrition during the first years of life. WASH Benefits is designed to measure intervention effects under conditions of high uptake in our target populations since our central hypotheses have not been tested rigorously in randomized studies. The enabling technologies and behavioral intervention packages were developed in the target populations over a two-year period before the start of the trials. Details of the behavior change theoretical frameworks and methods used in each country will be published in separate, forthcoming articles. Local promoters that are residents of the study villages deliver the interventions at the cluster level; each promoter completes at least 5 days of training with refresher courses periodically through the study period. Promoters visit and counsel study compounds weekly in the early phase of intervention, with visits declining in frequency over time; we anticipate visits as infrequent as one per month after one year of intervention.

The environmental interventions in this study focus on modifying the compound environment to reduce infant exposure to enteric pathogens. The interventions focus on compound-level modifications because we assume that the dominant transmission pathways for the infants in our study will be within the compound. Since we expect on average 8-10 household compounds with eligible children per study cluster, we expect to intervene in a small fraction of each community. While point-of-use water quality, hygiene and nutrition interventions operate at a household level, some sanitation interventions may require wider coverage in a neighborhood, community or other larger environment in order to effectively mitigate personal exposure. However, cost and logistical limitations prevented us extending implementation beyond the compound. Furthermore, a pilot study suggested that the compound was a relevant unit of intervention for modifying infant exposure to environmental conditions.<sup>63</sup>

## Control

It is possible that the simple act of regular visits by intervention promoters could lead to improvements in the primary outcomes through unknown channels that are independent of

1  
2  
3 WASH or nutrition interventions. The WASH Benefits team discussed this possibility extensively  
4  
5 in the year preceding the trials, and the teams agreed to pursue slightly different strategies in  
6  
7 the two countries. The Bangladesh team concluded that their intervention behavior change  
8  
9 model is so tightly integrated into the enabling technology components that the effect of a visit is  
10  
11 inseparable from the WASH and nutrition interventions themselves; moreover, it is fairly  
12  
13 common for mothers in the study area to be visited by community promoters associated with  
14  
15 other programs. The control arm in Bangladesh will be a “passive” control, meaning there is no  
16  
17 promotion or intervention activity during the study.  
18  
19

0  
1 The Kenya team was more concerned about the possibility of the promotion visits leading to  
2  
3 changes in behaviors not related to WASH or nutrition that could nonetheless affect the primary  
4  
5 outcomes since promoter visits are atypical in the Kenyan study area. For this reason, the  
6  
7 Kenya team decided to include promoters in their control arm and to add a simple activity  
8  
9 across all arms of the study: monthly measurement of mid-upper arm circumference (MUAC) or  
10  
11 measuring the pregnant woman’s belly circumference prior to the birth. The key assumption for  
12  
13 the Kenya design is that whatever non-WASH- or –nutrition-related behavior changes occur in  
14  
15 the intervention arms will also occur in the control arm. The Kenya control arm promoters do not  
16  
17 promote any water, sanitation, hygiene, or nutrition messages, and strictly engage in measuring  
18  
19 child MUAC and mother belly circumference. In all arms, children >6 months old with MUAC  
20  
21 <115mm are classified as severely malnourished and are referred to treatment (details below in  
22  
23 Referral Guidelines).  
24  
25  
26  
27  
28  
29  
30  
31  
32  
33  
34  
35  
36  
37  
38  
39  
40  
41  
42  
43  
44  
45  
46  
47  
48  
49  
50

### Water quality

1 The Bangladesh study delivers a 10-liter, insulated water storage vessel and a free supply  
2  
3 of chlorine tablets (Aquatabs® brand, sodium dichloroisocyanurate) to enrolled households to  
4  
5 improve the microbiological quality of their drinking water.<sup>86</sup> The Kenya study installs chlorine  
6  
7 dispensers within the cluster boundary at public water sources used by study participants. All  
8  
9  
0

1  
2  
3 community members will be able to use the dispensers. After filling their water collection  
4 container (typically a 20L plastic jerry can) at the source, users can place the container under  
5 the dispenser, and turn a knob to release 3 mL of 1.25% sodium hypochlorite, an amount  
6 designed to yield 2.0ml/L of free chlorine residual after 30 minutes for 20L of water.<sup>87</sup> The Kenya  
7 study also includes community level promotion of dispenser use, and all households in the study  
8 compound receive bottles of sodium hypochlorite (6 months' supply) to facilitate householders'  
9 water treatment during periods when they rely on rainwater harvesting (common during the  
10 rainy season) or if they use a water source where a dispenser has not been installed. In both  
11 countries, the behavior change strategies target the consistent provision of treated water to all  
12 children living in the household.  
13  
14  
15  
16  
17  
18  
19  
20  
21  
22  
23  
24  
25  
26  
27  
28  
29

## Sanitation

30 Both the Bangladesh and Kenya studies include three enabling technologies in the  
31 compound-level sanitation intervention with the goals of reducing children's exposure to feces in  
32 the household environment and increasing latrine use: 1) a locally developed sani-scoop  
33 dedicated to the removal of child and animal feces from the compound,<sup>88</sup> 2) plastic child potties  
34 for children ages 6 months and older until they use the latrine, and 3) a new or upgraded latrine  
35 for each household in the compound. In Bangladesh, latrines are upgraded to a dual pit latrine  
36 with a water seal and super structure. In Kenya, plastic latrine slabs that include a tightly fitting  
37 hole-cover are installed to improve existing latrines that have a mud or wood floor. Simple pit  
38 latrines (unlined pits with a earthen superstructure and the plastic slab) are constructed in the  
39 compounds of study participants who do not have access to a latrine. The behavior change  
40 strategies in both countries target the use of the latrine for defecation and the safe disposal of  
41 feces by all households in the compound to prevent contact by young children.  
42  
43  
44  
45  
46  
47  
48  
49  
50

## Handwashing

1  
2  
3 Both country studies install two handwashing stations for enrolled households: one near the  
4 latrine and one near the cooking area. In Bangladesh, handwashing stations include a locally  
5 made bucket with a tap fitting (40 L near the latrine, 16 L near the cooking area), a stool, a bowl,  
6 and a bottle to dispense soapy water. In Kenya, handwashing stations are constructed from  
7 locally available materials and include a dual tippy-tap design with independent pedals attached  
8 to two 5-liter jerry cans of clean water and soapy water.<sup>89</sup> In both countries the studies provide  
9 soap to families free of charge to replenish the handwashing stations. The behavior change  
10 strategies of the intervention target handwashing with soapy water messaging at two critical  
11 times for caregivers: after defecation/cleaning the child's anus and before food preparation.<sup>90</sup>  
12 Promoters frame the concept of handwashing as a nurturing behavior facilitated by the ease  
13 and convenience of a nearby handwashing station.<sup>91</sup>  
14  
15  
16  
17  
18  
19  
20  
21  
22  
23  
24  
25  
26  
27  
28  
29

### 30 Combined WSH

31 In both countries, the combined WSH intervention integrates all intervention components  
32 from the water quality, sanitation, and handwashing arms. Intervention promoters sequence the  
33 interventions so that they are not introduced at the same time. In Bangladesh, the interventions  
34 are delivered sequentially in the following order: sanitation, handwashing and water treatment,  
35 with a minimum of 21 days between each start date. In Kenya, all intervention technologies  
36 aside from latrine construction are provided at the same time but the behavior change  
37 counseling is rolled out in the following sequence approximately spaced approximately two  
38 weeks apart: handwashing and basic water treatment, sanitation, in-depth water treatment. The  
39 provision of latrines can range from one to several weeks after the commencement of work in a  
40 cluster in Kenya. The behavior change strategy emphasizes the interconnected aspect of  
41 WASH and the need to practice all behaviors in order to benefit from them.  
42  
43  
44  
45  
46  
47  
48  
49  
50

## Nutrition

In both countries, the nutrition intervention strategy targets age appropriate behaviors (pregnancy to 24 months) including use of and lipid-based nutrient supplements (ages 6 – 24 months). The behavior change counseling is modeled after the Guiding Principles for Complementary Feeding of the Breastfed Child,<sup>80</sup> the UNICEF Program Guide for Infant and Young Child Feeding Practices,<sup>81</sup> and the Alive and Thrive initiative.<sup>79</sup> Target behaviors include: 1) practice exclusive breastfeeding from birth to 6 months of age and introduce complementary foods at 6 months of age while continuing to breastfeed; 2) continue breast feeding as you did before receiving study-provided nutritional supplements; 3) provide your child micronutrient-rich foods such as meat, fish, eggs, and vitamin A rich fruits and vegetables (adapted to locally available food examples); and 4) feed your child complementary foods at least 2-3 times per day when 6-8 months old and 3-4 times per day when 9-24 months old.

When target children are between 6 and 24 months old, intervention promoters will deliver monthly supplies of Lipid-based Nutrient Supplements (LNS). The LNS used in the study is a next generation version of Nutributter®.<sup>92</sup> Appendix 1 includes the specific LNS formulation. LNS is administered daily using 10 gram sachets that can be mixed into pre-prepared meals (e.g., porridge) or consumed directly from the sachet; a child eats two sachets per day. LNS is intended to supplement – and not replace – breastfeeding and locally available complementary foods, by providing 118 kcal/day and including a broad suite of essential fatty acids and micronutrients at dosages appropriate for children in this age group.<sup>92</sup> It has an 18-month shelf life, does not spoil at high temperatures and costs as little as \$0.08 per day. Reported adherence has been 88% of days in controlled trials,<sup>14</sup> in part due to the ease of incorporating it into existing feeding routines. Breastfeeding is highly prevalent in both populations based on pilot studies, and so we have focused on supplements that would not replace this essential source of nutrition.<sup>93,94</sup> In Kenya, the trial will provide LNS to older, age-eligible siblings (6-24 months) living in study households to prevent potential sharing of LNS with older siblings. The

1  
2  
3 Bangladesh trial will deliver LNS only to target children because older, age-eligible siblings are  
4 rare in the study population.  
5  
6  
7  
8

### 9 10 Nutrition + Combined WSH

11  
12 In both countries the Nutrition + combined WSH arm will include the interventions delivered  
13 in the nutrition and combined WSH arms. The nutrition intervention is delivered in parallel with  
14 the WSH interventions according to the stage of pregnancy and age of the target child.  
15  
16  
17  
18  
19

### 20 21 Intervention monitoring

22  
23 Given the importance of good uptake (also called take-up or compliance) for the success of  
24 the trial, it is essential for the team to have early and frequent feedback on intervention uptake.  
25 If an intervention has poor uptake, then the team needs to consider modifying or redoubling  
26 implementation efforts in that arm. To preserve external validity, each country team will  
27 document any adaptive changes used to modify the intervention. Investigators will be blinded to  
28 outcomes from the trial, so any adaptation to intervention will be based solely on information  
29 about intervention implementation and uptake.  
30  
31  
32  
33  
34  
35  
36  
37

38 Both country teams have in place a detailed implementation monitoring system. One of the  
39 outputs from the monitoring system is a summary of whether the implementation has achieved a  
40 limited set of critical benchmarks ([Appendix 2](#)); benchmarks are intended to flag serious  
41 problems in implementation. If any of the uptake measures falls below its critical benchmark,  
42 then a qualitative team will review the monitoring and process documentation in the low  
43 performing area, visit the site of the low uptake, meet with intervention promoters, supervisors  
44 and study subjects, and troubleshoot the cause of the low uptake. Because the interventions  
45 have each been piloted and the pilots achieved these benchmarks of uptake, we expect that  
46 uptake below the benchmark will indicate a problem where the intervention was not  
47  
48  
49  
50



1  
2  
3 implemented as planned, and the investigation will identify what additional training or other  
4  
5 support is required to achieve high intervention uptake.  
6

7 Additional principles that we will follow with respect to adapting the interventions include:  
8

- 9  
10 1. If we identify easily fixable problems in an intervention that we expect will improve  
11 uptake, then we will make the change uniformly in the study population.  
12  
13 2. If we identify a problem in an intervention arm and devise a solution, the solution must  
14 be implemented in all clusters assigned to that intervention to ensure that we do not  
15 differentially modify the intervention on a subsample of the population.  
16  
17 3. Since WASH Benefits is an efficacy trial, we will replace broken hardware in our study  
18 population.  
19  
20 4. We will maintain a detailed record of the timing and scope of any changes to the  
21 interventions (if any).  
22  
23  
24  
25  
26  
27  
28  
29

## 30 31 **Outcomes**

### 32 **Primary outcomes**

33  
34 Primary outcomes include length-for-age Z-scores (LAZ) measured 24 months after  
35 intervention initiation in target children and diarrhea prevalence in compound children < 36  
36 months old at enrollment. Child age will be determined using birthdates verified when possible  
37 using vaccination cards. Following standard protocols for anthropometric outcomes  
38 measurement,<sup>95,96</sup> pairs of trained anthropometrists will measure recumbent length (accurate to  
39 0.1 cm) and weight without clothing (accurate to 0.1 kg) in triplicate. The median of the three  
40 measurements will be used in the analysis.<sup>97</sup> We will measure diarrhea at baseline among  
41 children <36 months old and again 12- and 24-months after intervention initiation using a  
42 definition of  $\geq 3$  loose or watery stools in 24 hours or  $\geq 1$  stool with blood based on caregiver  
43 reported symptoms;<sup>98</sup> we will use a 7-day recall period unless we find differential recall errors by  
44 randomized group, in which case we will use a 2-day recall period.<sup>99,100</sup>  
45  
46  
47  
48  
49  
50

## Secondary outcomes

Secondary outcomes include two additional measures of linear growth, child development measures, and measures of EE. We will calculate differences between groups in LAZ at the 12-month measurement, and stunting prevalence (LAZ < -2) at the 24-month measurement. At the 24-month visit, we will measure child development in communication, gross motor, and personal/social domains using the Extended Ages and Stages Questionnaire;<sup>11,101</sup> the instrument has been adapted to each study population, relies on caregiver-report, and has been used in many low-income countries.<sup>102</sup> We will compare groups for each domain independently, and overall by summing scores across domains. In a subsample of up to 1,500 children across four arms of each trial, we will measure EE biomarkers at 3, 12, and 24 months following intervention initiation (Figure 2); assays planned include: urinary lactulose mannitol ratio,<sup>103</sup> fecal myeloperoxidase,<sup>104</sup> fecal alpha-1-antitrypsin,<sup>105</sup> fecal neopterin,<sup>106</sup> and plasma total IgG.<sup>37</sup>

## Additional outcomes

The study will collect stool specimens from 7 target children per cluster at the 24 month visit and from an older child living in the compound (Figure 3), and will test specimens for soil transmitted helminths (*Ascaris lumbricoides*, *Trichuris trichiura*, hookworm) using the Kato-Katz method<sup>107</sup> and protozoans (*Giardia lamblia*, *Cryptosporidium parvum*, *Entamoeba histolytica*) using PCR methods (Bangladesh) and commercial enzyme-linked immunosorbent assay kits (Kenya). Appendix 3 includes a full list of tertiary outcomes. In a subsample of households in which the study measures EE biomarkers, we will also measure markers of environmental fecal contamination to help trace the causal path between the interventions and outcomes. Environmental contamination measures will include enumeration of fecal indicator bacteria (*Escherichia coli*) in household stored drinking water, on child toy balls, and child hand rinses. In

1  
2  
3 addition, the study will collect quantitative measures of fly density at the latrine and the food  
4 preparation area.  
5  
6  
7

## 8 9 10 **Referral guidelines**

11  
12 The study will refer participants for treatment at appropriate local government health care  
13 providers if we observe any of the three following outcomes: soy or nut allergies related to LNS,  
14 acute malnutrition, and intestinal parasite infection (described below).  
15  
16  
17  
18  
19

### 0 1 **Soy or nut allergies related to LNS**

2  
3 In the LNS arms, intervention promoters will recommend that caregivers stop using the LNS  
4 and notify one of the study staff immediately should their child have any adverse reactions  
5 shortly after ingesting the supplement (such as vomiting, stomach pain, rash, breathing  
6 problems with wheezing). In the event of an adverse reaction, study staff will assess the child's  
7 condition and, if necessary, provide transport to the closest medical facility for treatment.  
8  
9  
10  
11  
12  
13  
14  
15  
16  
17  
18  
19  
20  
21  
22  
23  
24  
25  
26  
27  
28  
29  
30  
31  
32  
33  
34  
35  
36  
37  
38  
39  
40  
41  
42  
43  
44  
45  
46  
47  
48  
49  
50  
51  
52  
53  
54  
55  
56  
57  
58  
59  
60

### 57 **Acute malnutrition:**

58 In the anthropometry and enteropathy assessment survey, children who are found to be  
59 acutely malnourished based on WHO/Unicef criteria (severely wasted [WLZ < -3] and/or bipedal  
60 edema) will be referred to the appropriate existing treatment programs in each country. In  
61 Kenya, where promoters measure MUAC each month for all target children, children >6 months  
62 with MUAC <115mm will be considered severely malnourished and will be referred to treatment.  
63  
64  
65  
66  
67  
68  
69  
70  
71  
72  
73  
74  
75  
76  
77  
78  
79  
80  
81  
82  
83  
84  
85  
86  
87  
88  
89  
90  
91  
92  
93  
94  
95  
96  
97  
98  
99  
100

### 97 **Intestinal parasites:**

98 All children who provide a stool specimen in the 24-month survey will be offered deworming  
99 medication, which is consistent with national standards in both countries.  
100

## Randomization and Blinding

The trials will randomly allocate clusters to each intervention arm of the study in equal proportion along with a double-sized control arm. The randomization is pair-matched by geography, with adjacent clusters randomized in blocks. The rationale for using geography to match the randomization is that it is logistically feasible, it may add efficiency to our effect estimation if geography is strongly correlated with our outcomes, and it will help ensure that the different arms are balanced with respect to characteristics and events that are spatially clustered. In Bangladesh, the trial will randomize groups of 8 geographically proximate clusters to one of the 6 intervention arms or the double-sized control arm with allocation probabilities of 2/8 for control and 1/8 for each intervention arm. In Kenya, the randomization is identical but includes 9 proximate clusters in each block with allocation probabilities of 2/9 for active control, 1/9 for each intervention arm, and 1/9 for a potential passive control (not yet funded). Clusters allocated to a passive control arm in Kenya will enable the study to measure the effect of regular visits to the study's active control arm, if any, pending future funding.

The randomization sequence generation and allocation for both trials will be conducted by the coordinating team at the University of California, Berkeley using a random number generator in Stata v12 (StataCorp, College Station, TX) with a reproducible seed. Due to the nature of the interventions, participants are not blinded to their treatment assignment. Principal investigators and primary analysts for the trial will remain blinded to the randomized group assignments until the primary analysis is complete. Cluster level assignments will be under control of each country's lead data manager in separate data files that are independent from the main datasets of the study. Access to the treatment assignment information (even if blinded), will be limited to the core analysis team in each country until the primary results are published.

## Sample Size

1  
2  
3 The sample size calculations were based on the two primary outcomes: LAZ and caregiver-  
4 reported diarrhea. We calculated the minimum detectable effect for LAZ measured at two years  
5 using a standard equation,<sup>108</sup> and for diarrhea using a simulation-based approach to  
6 accommodate two levels of correlation in the outcome (within-child and within-cluster).<sup>109</sup> To  
7 inform our sample size calculations we used existing datasets from relevant populations. In  
8 Bangladesh, we used diarrhea and anthropometric measurements from 982 children < 36  
9 months, collected from 100 rural villages between 2007-2009.<sup>110</sup> In Kenya, we informed the  
10 sample size calculations using diarrhea data collected from 1,704 children in 95 control villages  
11 enrolled in a cluster-randomized trial of spring protection conducted in Western Province  
12 between 2005 and 2007;<sup>85</sup> we also informed the sample size calculation with LAZ  
13 measurements from 310 children 4 – 30 months old in a pilot study in our study region. We  
14 selected final designs in each country to detect differences of +0.15 in LAZ and a relative risk of  
15 diarrhea of 0.7 or smaller for a comparison of any intervention with the double-sized control arm.  
16 We chose the effect size for LAZ based on our team's expert opinion of the smallest effect that  
17 would be biologically meaningful and measurable given measurement error in field conditions  
18 (+0.15 Z equals 0.48 cm in a 24 month old girl). We chose the effect size for diarrhea based on  
19 earlier WASH efficacy studies.<sup>111</sup> The control arm is double-sized because it will be used in  
20 multiple hypothesis tests and, given available information, a 2:1 allocation ratio is close to the  
21 optimal allocation that minimizes the variance for the six tests planned under our first  
22 hypothesis, below.<sup>112,113</sup> Appendix 4 includes the detailed assumptions used in the calculations.

## Analysis Plan

### General analysis approach

Each study team will develop its own analysis plan, but both teams will include in their analyses unadjusted means and SDs by randomized group, along with unadjusted comparisons between groups for the primary hypotheses.<sup>114,115</sup> We will also re-estimate our parameters of

interest in adjusted analyses (details below). We will produce public replication files for our primary analyses in both countries. We will analyze participants according to their randomized assignment (intention to treat; ITT).

### Parameters of interest

This section discusses parameters of interest for the primary analyses. Let  $Y$  be an outcome of interest and let  $T$  index the randomized group assignment, where  $T \in (C, W, S, H, WSH, N, NWSH)$ . There are seven arms:  $C$ =control;  $W$ =water;  $S$ =sanitation;  $H$ =handwashing;  $WSH$ =combined water, sanitation and handwashing;  $N$ =nutrition supplement; and  $NWSH$ = nutrition plus combined  $WSH$ . Let  $Z$  be a set of indicators for matched blocks used in the randomization. Finally, let  $\psi$  denote parameters of interest. In each comparison below, we define  $\psi$  as a difference between various randomized groups. For dichotomous outcomes like diarrhea, this implies a risk difference. We will additionally report risk ratios for dichotomous outcomes as recommended by CONSORT.<sup>114</sup>

*H1: Water, sanitation, handwashing, nutrition and their combination reduce child diarrhea and improve linear growth.*

The mean outcomes in each active intervention arm ( $W, S, H, WSH, N, NWSH$ ) will be compared to the mean outcomes in the control arm (6 comparisons per outcome). The null hypothesis is that there is no difference between intervention and control. The same control group (double sized) will be used in every comparison. The parameters of interest are the difference in means between the intervention groups and the control group. For  $t \in (W, S, H, WSH, N, NWSH)$ :

$$\psi_{1,t} = E_Z( E[Y | T = t, Z] - E[Y | T = C, Z] )$$

*H2: When delivered in combination, water, sanitation and handwashing interventions reduce child diarrhea more than when delivered individually.*

The combined arm (*WSH*) treatment effect for diarrhea will be compared to individual WASH treatment effects to determine whether the combined effect is larger than the individual effects. The parameters of interest are the difference in means between the combined group and the individual intervention groups. For  $t \in (w, s, H)$ :

$$\psi_{2,t} = E_Z( E[Y | T = WSH, Z] - E[Y | T = t, Z] )$$

Note that this parameter and associated test differs from a test for interaction (departure from additive effects). We expect this study to have limited power to detect interactions between interventions, but describe tests in [Appendix 5](#).

*H3: Combined Nutrition and WASH interventions reduce diarrhea and improve linear growth more than each component alone*

We will compare the combined Nutrition+WASH arm (*NWSH*) treatment effects for growth to the nutrition arm (*N*) and the combined WASH arm (*WSH*). The null hypothesis is that the treatment effect in the combined arm is equal to the single arms, and the parameter of interest is the difference in means between groups. For  $t \in (WSH, N)$ :

$$\psi_{3,t} = E_Z( E[Y | T = NWSH, Z] - E[Y | T = t, Z] )$$

As with H2, this hypothesis is not a hypothesis of interaction or synergy. Rather, it is a test to determine if one intervention is better than another (additive interaction would test whether the combined arm is greater than the sum of the independent intervention arms). If the interaction were of equal magnitude to the overall treatment effect, a roughly four-fold increase in the sample size would be required,<sup>116</sup> which would be logistically infeasible given the already large size of the trial.

## Testing and estimation

One strength of a randomized trial is that it allows investigators to draw inference non-parametrically, relying only on randomization.<sup>117</sup> One approach to test for statistical significance is a permutation test based on randomly permuting randomized assignments in the data (following the original randomization strategy, i.e., permuting  $T$  within strata  $Z$ ), and re-estimating a test statistic.<sup>117–121</sup> We plan to use a rank-based test statistic, which has been shown to have good power against alternatives,<sup>122</sup> and estimate it on un-weighted cluster means.<sup>118,119</sup> We will use one-sided tests because we would only expect the interventions to be beneficial.<sup>123</sup> Due to the relatively small number of tests involved, we do not plan to adjust the  $P$ -values for multiple testing.<sup>124</sup>

The permutation test is a test for statistical independence with good power against alternatives but does not estimate a specific parameter of interest (and thus will not provide standard errors and confidence intervals for our parameters). Since the trials depart from an individually randomized design, we will bootstrap the dataset, resampling clusters in matched blocks with replacement, and re-estimate our parameters of interest. Resampling matched blocks preserves the correlation structure in the data and retains any efficiency gains from the matched randomization. Since we will have a large number of units to resample, the asymptotic assumptions will be reasonable, the bootstrap distribution will be smooth, and percentile-based confidence intervals will be accurate for all parameters of interest. We will examine the bootstrap estimate of the sampling distribution to confirm these assumptions. The SDs of the bootstrap distributions will provide estimates of the standard error.

We will complement our unadjusted analyses with a second set of estimates that are conditional on baseline covariates to potentially increase the efficiency of our analysis and reduce bias from any chance imbalances in prognostic covariates despite randomization.<sup>125</sup> It is straight-forward to extend permutation tests to include covariate adjustment while still taking advantage of the exact distribution theory provided by randomized inference.<sup>118,120</sup> For



example, let  $Y_{ijk}$  be the outcome of interest for individual  $i$  in village  $j$  and randomization stratum  $k$ ; let  $T_{ijk}$  be the randomized intervention indicator, and  $X_{ijk}$  be a vector of adjustment covariates. Models are fit of the form:  $E[Y_{ijk} | X_{ijk}] = m(X_{ijk})$ , where  $m(\cdot)$  is some function of the covariates  $X$ . For example,  $m(X_{ijk}) = \alpha_k + \beta \times X_{ijk} + \varepsilon_{ijk}$  for a linear regression, but it could be a more sophisticated prediction function. The residuals are then calculated using predicted values of  $Y_{ijk}$  from the model:  $r_{ijk} = Y_{ijk} - \hat{Y}_{ijk}$ , and the permutation test is conducted on the residuals. The test has nominal size for the null hypothesis even if the model  $m(\cdot)$  is mis-specified and if the covariates are measured with error.<sup>118,120</sup> There is no stochastic model for  $m(\cdot)$ , just a reduced algorithmic fit; the approach increases statistical efficiency because the residuals are less variable than the original outcomes, assuming the covariates are strongly associated with the outcome or heterogeneous within strata.<sup>118</sup>

Following CONSORT guidelines,<sup>114,115</sup> we pre-specify a repeatable, objective approach that we will use to identify adjustment covariates. We plan to consider the following covariates in adjusted models:

- Administrative Union (Bangladesh) or Location (Kenya)
- Field staff team member who recorded the measurement
- Time between intervention delivery and measurement
- Month of measurement, to account for seasonal variation
- Household food insecurity
- Child age
- Child sex
- Mother's age
- Mother's height
- Mother's education level and literacy
- Number of children < 15 y in the household

- Number of individuals living in the compound
- Distance (in minutes) to the primary water source
- Housing materials (floor, walls, roof) and household assets

We will use a repeatable data-adaptive algorithm to control for the covariates flexibly and semi-parametrically that will be chosen before the analysis (e.g., <sup>126</sup>). We will calculate adjusted *P*-values using the permutation test described above based on predicted residuals from the algorithm. We will estimate SEs, and confidence intervals for our parameters of interest using the bootstrap described in the unadjusted analysis section. [Appendix 5](#) includes the details of additional, pre-specified analyses, including tests of interactions between interventions, subgroup analyses, and tests for between-cluster spillover effects.

#### Differential attrition (loss to follow-up): detection and effect bounds calculation

The study will track enrolled participants carefully to help minimize attrition in the study. We will compare attrition rates across randomized arms, and we will compare the characteristics of those lost to follow-up versus those that remain to determine whether attrition is random. If we find systematic attrition that is not balanced across arms, then we will conduct sensitivity analyses using “worst-case” imputation bounds for our effect estimates (proposed by Horowitz and Manski,<sup>127</sup> and summarized by Duflo et al.,<sup>108</sup> and we will also calculate bounds proposed by Lee.<sup>128</sup> If overall levels of attrition approach 20%, we will attempt to locate individuals who left the study area to measure outcomes at the 2-year measurement and include them in our analyses; if attrition is high we will also consider the use of semi-parametric weighting using baseline characteristics.<sup>129</sup>

#### Interim analyses and stopping rules

*Interim Analyses:* Except for monitoring uptake of the interventions described above, the WASH Benefits study team does not plan to conduct interim outcome analyses that include

1  
2  
3 information about randomized assignment until all of the data from the 2-year measurement are  
4 collected.<sup>125,130,131</sup>  
5  
6

7 *Negative Stopping Rule:* There is always a risk that interventions will have unintended  
8 consequences. Although we would not conduct the trial if we anticipated such harm, the  
9 interventions are complex and there is always the chance for unanticipated outcomes. If one of  
10 the country Data and Safety Monitoring Boards were to find clear evidence of harm based on  
11 adverse events, then the study will halt the harmful intervention arm under international ethical  
12 guidelines for medical research.<sup>132</sup>  
13  
14  
15  
16  
17  
18  
19

20 *Positive Stopping Rule:* Since this is an efficacy study designed to identify proof of principle,  
21 even if a marked early benefit is identified with one or more of the interventions, neither the  
22 study implementers nor the Governments of Bangladesh or Kenya will be in a position to  
23 immediately scale up effective interventions. Thus, the social benefit of early stoppage is limited.  
24 However, we will provide 1-year anthropometry measurements to each country's DSMB. If at  
25 the 1-year measurement, child length for age Z- score in any of the intervention arms is more  
26 than 2.0 standard deviations above the control arm we will look to the country DSMB to decide  
27 on the appropriateness of continuing the trial.  
28  
29  
30  
31  
32  
33  
34  
35  
36  
37  
38  
39

#### 40 *Additional analyses*

41 WASH Benefits is a large study with many collaborators, and the research will be able to  
42 answer scientific questions beyond those posed in this protocol. Indeed, the study team expects  
43 to conduct and publish analyses that extend beyond those specified in this protocol. For  
44 example, Objective 5 of the study is to explore the association between multiple enteric infection  
45 measures collected in the study. Yet, many promising multiplex antigen assays for parasitic  
46 infection are still in development and so the study plans to archive samples for future analyses.  
47  
48  
49  
50  
51  
52  
53  
54  
55  
56  
57  
58  
59  
60

## ETHICS AND DISSEMINATION

Study protocols have been reviewed and approved by institutional review boards at the University of California, Berkeley, Stanford University, the International Centre for Diarrhoeal Disease Research, Bangladesh (icddr,b), the Kenya Medical Research Institute (KEMRI), and Innovations for Poverty Action (IPA). Each trial is overseen by an independent Data and Safety Monitoring Board, which review the study protocols and monitor severe adverse events. All study communities, compounds, and caregivers provide informed consent. The data collected in the study will be publically distributed along with metadata and critical documents (i.e., protocols and questionnaires) following the publication of the primary results from the trials, which is expected to be within 24 months of the final data collection date.

## FIGURE LEGENDS

### Figure 1.

Summary of the overall study design in both countries, including cluster and target child enrollment in each arm. Growth and diarrhea measurements will take place at 15- and 27-months following enrollment, which corresponds to 12- and 24- months following initial intervention delivery due to a 3-month lag between enrollment and intervention implementation. Abbreviations for intervention arms: C = control; W = improved water quality; S = improved sanitation; H = improved handwashing; WSH = combined improvements in water quality, sanitation, and handwashing; N = improved nutrition; WSH+N = combined improvements in water quality, sanitation, handwashing, and nutrition.

### Figure 2.

Summary of the environmental enteropathy (EE) subsample in both countries, including cluster and target child enrollment in each arm. The EE subsample includes an equal number of clusters and target children from 4 arms of the study. Abbreviations for intervention arms: C = control; W = improved water quality; S = improved sanitation; H = improved handwashing; WSH = combined improvements in water quality, sanitation, and handwashing; N = improved nutrition; WSH+N = combined improvements in water quality, sanitation, handwashing, and nutrition.

### Figure 3.

Summary of enteric parasite measurement in both countries, including cluster and target child enrollment in each arm. At enrollment stool specimens will be collected from an older sibling

1  
2  
3 aged 18-27 months if present and will be tested for protozoan infections. At the final  
4 measurement, specimens will be collected from the same older siblings plus 7 target children  
5 per cluster in each country, and analyzed for protozoan infections and soil transmitted helminth  
6 infections. Abbreviations for intervention arms: C = control; W = improved water quality; S =  
7 improved sanitation; H = improved handwashing; WSH = combined improvements in water  
8 quality, sanitation, and handwashing; N = improved nutrition; WSH+N = combined  
9 improvements in water quality, sanitation, handwashing, and nutrition.  
10  
11  
12  
13  
14  
15  
16  
17  
18  
19  
20  
21  
22  
23  
24  
25  
26  
27  
28  
29  
30  
31  
32  
33  
34  
35  
36  
37  
38  
39  
40  
41  
42  
43  
44  
45  
46  
47  
48  
49  
50

For peer review only

## Acknowledgements

The authors would like to thank Michael Kremer, Shaila Arman, Farzana Begum, Jade Benjamin-Chung, Colin Christensen, Ayse Ercumen, Fabian Esamai, Muhammad Faruque Hussain, Kaniz Khatun-e-Jannat, Charles Mwandawiro, Md. Fosiul Alam Nizame, Carol Nekesa, Tadeo Muriuki, Victor Owino, and Md. Mahbubur Rahman for additional substantive input to the study design, intervention development, or study protocols.

## Description of each author's contribution to writing the protocol

BFA, CN, SPL, LU, CPS, SA, GC, AEH, AL, AJP, and JMC drafted the protocol. KGD, TA, TC, HD, LHF, RH, PK, EL, SMN, PKR, FT, and PJW reviewed and provided critical input to the protocol.

## Registration

Trial registration identifiers (www.clinicaltrials.gov): NCT01590095 (Bangladesh), NCT01704105 (Kenya).

## Funding statement

This study was funded by a grant from the Bill & Melinda Gates Foundation to the University of California, Berkeley, grant number OPPGD759.

## Competing interests statement

The authors have no competing interests.

## Data Sharing Statement

The data collected in the study will be publically distributed along with metadata and critical documents (i.e., protocols and questionnaires) following the publication of the primary results from the trials, which is expected to be within 24 months of the final data collection date.

For peer review only

## REFERENCES

- 1 Lim SS, Vos T, Flaxman AD, *et al.* A comparative risk assessment of burden of disease and injury attributable to 67 risk factors and risk factor clusters in 21 regions, 1990-2010: a systematic analysis for the Global Burden of Disease Study 2010. *Lancet* 2013;**380**:2224–60.
- 2 Adair LS, Fall CH, Osmond C, *et al.* Associations of linear growth and relative weight gain during early life with adult health and human capital in countries of low and middle income: findings from five birth cohort studies. *Lancet* 2013.
- 3 Crimmins EM, Finch CE. Infection, inflammation, height, and longevity. *Proc Natl Acad Sci U S A* 2006;**103**:498–503.
- 4 Victora CG, Adair L, Fall C, *et al.* Maternal and child undernutrition: consequences for adult health and human capital. *Lancet* 2008;**371**:340–57.
- 5 Prentice AM, Ward KA, Goldberg GR, *et al.* Critical windows for nutritional interventions against stunting. *Am J Clin Nutr* 2013;**97**:911–8.
- 6 Victora CG, de Onis M, Hallal PC, *et al.* Worldwide timing of growth faltering: revisiting implications for interventions. *Pediatrics* 2010;**125**:e473–e480.
- 7 Grantham-McGregor S, Cheung YB, Cueto S, *et al.* Developmental potential in the first 5 years for children in developing countries. *Lancet* 2007;**369**:60–70.
- 8 Black RE, Allen LH, Bhutta ZA, *et al.* Maternal and child undernutrition: global and regional exposures and health consequences. *Lancet* 2008;**371**:243–60.
- 9 Bowen A, Agboatwalla M, Luby S, *et al.* Association Between Intensive Handwashing Promotion and Child Development in Karachi, Pakistan: A Cluster Randomized Controlled Trial. *Arch Pediatr Adolesc Med* 2012;:1–8.
- 10 Kielmann AA, DeSweemer C, Blot W, *et al.* Integrated Nutrition and Health Care, Vol. 1. The Johns Hopkins University Press: Baltimore. A World Bank Research Publication. 1983. 95–125.
- 11 Fernald LCH, Kariger P, Engle PL, *et al.* *Examining Early Child Development in Low-Income Countries: A Toolkit for the Assessment of Children in the First Five Years of Life.* World Bank Human Development Group 2009.
- 12 Black RE, Victora CG, Walker SP, *et al.* Maternal and child undernutrition and overweight in low-income and middle-income countries. *Lancet* 2013.
- 13 Bhutta ZA, Das JK, Rizvi A, *et al.* Evidence-based interventions for improvement of maternal and child nutrition: what can be done and at what cost? *Lancet* 2013.
- 14 Adu-Afarwuah S, Lartey A, Brown KH, *et al.* Home fortification of complementary foods with micronutrient supplements is well accepted and has positive effects on infant iron status in Ghana. *Am J Clin Nutr* 2008;**87**:929–38.



- 1  
2  
3  
4  
5  
6  
7  
8  
9  
10  
11  
12  
13  
14  
15  
16  
17  
18  
19  
20  
21  
22  
23  
24  
25  
26  
27  
28  
29  
30  
31  
32  
33  
34  
35  
36  
37  
38  
39  
40  
41  
42  
43  
44  
45  
46  
47  
48  
49  
50
- 15 Adu-Afarwuah S, Lartey A, Brown KH, *et al.* Randomized comparison of 3 types of micronutrient supplements for home fortification of complementary foods in Ghana: effects on growth and motor development. *Am J Clin Nutr* 2007;**86**:412–20.
  - 16 Dewey KG, Adu-Afarwuah S. Systematic review of the efficacy and effectiveness of complementary feeding interventions in developing countries. *Matern Child Nutr* 2008;**4 Suppl 1**:24–85.
  - 17 Phuka JC, Maleta K, Thakwalakwa C, *et al.* Complementary feeding with fortified spread and incidence of severe stunting in 6- to 18-month-old rural Malawians. *Arch Pediatr Adolesc Med* 2008;**162**:619–26.
  - 18 Phuka J, Thakwalakwa C, Maleta K, *et al.* Supplementary feeding with fortified spread among moderately underweight 6-18-month-old rural Malawian children. *Matern Child Nutr* 2009;**5**:159–70.
  - 19 Bhutta ZA, Ahmed T, Black RE, *et al.* What works? Interventions for maternal and child undernutrition and survival. *Lancet* 2008;**371**:417–40.
  - 20 Walker CLF, Perin J, Aryee MJ, *et al.* Diarrhea incidence in low- and middle-income countries in 1990 and 2010: a systematic review. *BMC Public Health* 2012;**12**:220.
  - 21 Guerrant RL, Schorling JB, McAuliffe JF, *et al.* Diarrhea as a cause and an effect of malnutrition: diarrhea prevents catch-up growth and malnutrition increases diarrhea frequency and duration. *Am J Trop Med Hyg* 1992;**47**:28–35.
  - 22 Checkley W, Epstein LD, Gilman RH, *et al.* Effects of *Cryptosporidium parvum* infection in Peruvian children: growth faltering and subsequent catch-up growth. *Am J Epidemiol* 1998;**148**:497–506.
  - 23 Checkley W, Epstein LD, Gilman RH, *et al.* Effects of acute diarrhea on linear growth in Peruvian children. *Am J Epidemiol* 2003;**157**:166–75.
  - 24 Checkley W, Buckley G, Gilman RH, *et al.* Multi-country analysis of the effects of diarrhoea on childhood stunting. *Int J Epidemiol* 2008;**37**:816–30.
  - 25 Kossmann J, Nestel P, Herrera MG, *et al.* Undernutrition and childhood infections: a prospective study of childhood infections in relation to growth in the Sudan. *Acta Paediatr* 2000;**89**:1122–8.
  - 26 Esrey SA. Water, waste, and well-being: a multicountry study. *Am J Epidemiol* 1996;**143**:608–23.
  - 27 Moore SR, Lima AA, Conaway MR, *et al.* Early childhood diarrhoea and helminthiasis associate with long-term linear growth faltering. *Int J Epidemiol* 2001;**30**:1457–64.
  - 28 Guerrant RL, Oria RB, Oria MOB, *et al.* Malnutrition as an enteric infectious disease with long-term effects on child development. *Nutr Rev* 2008;**66**:487–505.

- 1  
2  
3 29 Berkman DS, Lescano AG, Gilman RH, *et al*. Effects of stunting, diarrhoeal disease, and  
4 parasitic infection during infancy on cognition in late childhood: a follow-up study. *Lancet*  
5 2002;**359**:564–71.  
6  
7  
8 30 Haghghi P, Wolf PL. Tropical sprue and subclinical enteropathy: a vision for the nineties.  
9 *Crit Rev Clin Lab Sci* 1997;**34**:313–41.  
10  
11 31 Lunn PG. The impact of infection and nutrition on gut function and growth in childhood.  
12 *Proc Nutr Soc* 2000;**59**:147–54.  
13  
14 32 Prendergast A, Kelly P. Enteropathies in the developing world: neglected effects on global  
15 health. *Am J Trop Med Hyg* 2012;**86**:756–63.  
16  
17 33 McKay S, Gaudier E, Campbell DI, *et al*. Environmental enteropathy: new targets for  
18 nutritional interventions. *Int Health* 2010;**2**:172–80.  
19  
20 34 Salazar-Lindo E, Allen S, Brewster DR, *et al*. Intestinal infections and environmental  
21 enteropathy: Working Group report of the second World Congress of Pediatric  
22 Gastroenterology, Hepatology, and Nutrition. *J Pediatr Gastroenterol Nutr* 2004;**39 Suppl**  
23 **2**:S662–S669.  
24  
25 35 Lindenbaum J, Gerson CD, Kent TH. Recovery of small-intestinal structure and function  
26 after residence in the tropics. I. Studies in Peace Corps volunteers. *Ann Intern Med*  
27 1971;**74**:218–22.  
28  
29 36 Gerson CD, Kent TH, Saha JR, *et al*. Recovery of small-intestinal structure and function  
30 after residence in the tropics. II. Studies in Indians and Pakistanis living in New York City.  
31 *Ann Intern Med* 1971;**75**:41–8.  
32  
33 37 Campbell DI, Elia M, Lunn PG. Growth faltering in rural Gambian infants is associated with  
34 impaired small intestinal barrier function, leading to endotoxemia and systemic  
35 inflammation. *J Nutr* 2003;**133**:1332–8.  
36  
37 38 Kosek M, Haque R, Lima A, *et al*. Fecal Markers of Intestinal Inflammation and  
38 Permeability Associated with the Subsequent Acquisition of Linear Growth Deficits in  
39 Infants. *Am J Trop Med Hyg* 2013;**88**:390–6.  
40  
41 39 Dewey KG, Mayers DR. Early child growth: how do nutrition and infection interact? *Matern*  
42 *Child Nutr* 2011;**7 Suppl 3**:129–42.  
43  
44 40 Lutter C, Habicht J, Rivera J, *et al*. The relationship between energy intake and diarrhoeal  
45 disease in the effects on child growth: biological model, evidence and implications for  
46 public health policy. *Food Nut Bull* 1992;**14**:36–42.  
47  
48 41 Lutter CK, Mora JO, Habicht JP, *et al*. Nutritional supplementation: effects on child stunting  
49 because of diarrhea. *Am J Clin Nutr* 1989;**50**:1–8.  
50  
51 42 Martorell R, Habicht JP, Rivera JA. History and design of the INCAP longitudinal study  
52 (1969–77) and its follow-up (1988–89). *J Nutr* 1995;**125**:1027S–1041S.  
53  
54  
55  
56  
57  
58  
59  
60

- 1  
2  
3 43 Thurnham DI, Northrop-Clewes CA, McCullough FS, *et al.* Innate immunity, gut integrity,  
4 and vitamin A in Gambian and Indian infants. *J Infect Dis* 2000;**182** Suppl 1:S23–S28.  
5  
6  
7 44 Lima NL, Soares AM, Mota RMS, *et al.* Wasting and intestinal barrier function in children  
8 taking alanyl-glutamine-supplemented enteral formula. *J Pediatr Gastroenterol Nutr*  
9 2007;**44**:365–74.  
10  
11 45 Manary MJ, Abrams SA, Griffin IJ, *et al.* Perturbed zinc homeostasis in rural 3-5-y-old  
12 Malawian children is associated with abnormalities in intestinal permeability attributed to  
13 tropical enteropathy. *Pediatr Res* 2010;**67**:671–5.  
14  
15 46 Roy SK, Behrens RH, Haider R, *et al.* Impact of zinc supplementation on intestinal  
16 permeability in Bangladeshi children with acute diarrhoea and persistent diarrhoea  
17 syndrome. *J Pediatr Gastroenterol Nutr* 1992;**15**:289–96.  
18  
19 47 Galpin L, Manary MJ, Fleming K, *et al.* Effect of Lactobacillus GG on intestinal integrity in  
20 Malawian children at risk of tropical enteropathy. *Am J Clin Nutr* 2005;**82**:1040–5.  
21  
22 48 Williams EA, Elia M, Lunn PG. A double-blind, placebo-controlled, glutamine-  
23 supplementation trial in growth-faltering Gambian infants. *Am J Clin Nutr* 2007;**86**:421–7.  
24  
25 49 Van der Merwe LF, Moore SE, Fulford AJ, *et al.* Long-chain PUFA supplementation in rural  
26 African infants: a randomized controlled trial of effects on gut integrity, growth, and  
27 cognitive development. *Am J Clin Nutr* 2013;**97**:45–57.  
28  
29 50 Mullen A, Gosset L, Larke N, *et al.* The effects of micronutrient-fortified  
30 complementary/replacement food on intestinal permeability and systemic markers of  
31 inflammation among maternally HIV-exposed and unexposed Zambian infants. *Br J Nutr*  
32 2011;**115**:1–10.  
33  
34 51 Dangour AD, Watson L, Cumming O, *et al.* Interventions to improve water quality and  
35 supply, sanitation and hygiene practices, and their effects on the nutritional status of  
36 children. *The Cochrane Library* Published Online First: October 2011.  
37 doi:10.1002/14651858.CD009382  
38  
39 52 Arnold BF, Khush RS, Ramaswamy P, *et al.* Causal inference methods to study  
40 nonrandomized, preexisting development interventions. *Proc Natl Acad Sci U S A*  
41 2010;**107**:22605 – 22610.  
42  
43 53 Langford R, Lunn P, Panter-Brick C. Hand-washing, subclinical infections, and growth: a  
44 longitudinal evaluation of an intervention in Nepali slums. *Am J Hum Biol* 2011;**23**:621–9.  
45  
46 54 Luby SP, Agboatwalla M, Painter J, *et al.* Combining drinking water treatment and hand  
47 washing for diarrhoea prevention, a cluster randomised controlled trial. *Trop Med Int*  
48 *Health* 2006;**11**:479–89.  
49  
50 55 Stanton BF, Clemens JD. An educational intervention for altering water-sanitation  
51 behaviors to reduce childhood diarrhea in urban Bangladesh. II. A randomized trial to  
52 assess the impact of the intervention on hygienic behaviors and rates of diarrhea. *Am J*  
53 *Epidemiol* 1987;**125**:292–301.  
54  
55  
56  
57  
58  
59  
60

- 1  
2  
3 56 Stanton BF, Clemens JD, Khair T. Educational intervention for altering water-sanitation  
4 behavior to reduce childhood diarrhea in urban Bangladesh: impact on nutritional status.  
5 *Am J Clin Nutr* 1988;**48**:1166–72.  
6  
7  
8 57 Cousens SN, Mertens TE, Fernando MA. The anthropometric status of children in  
9 Kurunegala district in Sri Lanka: its relation to water supply, sanitation and hygiene  
10 practice. *Trop Med Parasitol* 1990;**41**:105–14.  
11  
12 58 Esrey SA, Habicht JP, Casella G. The complementary effect of latrines and increased  
13 water usage on the growth of infants in rural Lesotho. *Am J Epidemiol* 1992;**135**:659–66.  
14  
15 59 Checkley W, Gilman RH, Black RE, *et al.* Effect of water and sanitation on childhood  
16 health in a poor Peruvian peri-urban community. *Lancet* 2004;**363**:112–8.  
17  
18 60 Du Preez M, Conroy RM, Ligondo S, *et al.* Randomized Intervention Study of Solar  
19 Disinfection of Drinking Water in the Prevention of Dysentery in Kenyan Children Aged  
20 under 5 Years. *Environ Sci Technol* 2011;**45**:9315–23.  
21  
22 61 Hunter PR, Bartram J, Cairncross S. Comment on ‘Randomized intervention study of solar  
23 disinfection of drinking water in the prevention of dysentery in Kenyan children aged under  
24 5 years’. *Environ Sci Technol* 2012;**46**:3035; author reply 3036–3035; author reply 3037.  
25  
26 62 Arnold BF, Mäusezahl D, Schmidt W-P, *et al.* Comment on randomized intervention study  
27 of solar disinfection of drinking water in the prevention of dysentery in Kenyan children  
28 aged under 5 years. *Environ Sci Technol* 2012;**46**:3031–2; author reply 3033–4.  
29  
30 63 Lin A, Arnold BF, Afreen S, *et al.* Household Environmental Conditions Are Associated with  
31 Enteropathy and Impaired Growth in Rural Bangladesh. *Am J Trop Med Hyg* Published  
32 Online First: April 2013. doi:10.4269/ajtmh.12-0629  
33  
34 64 Clasen T, Boisson S, Routray P, *et al.* The effect of improved rural sanitation on diarrhoea  
35 and helminth infection: design of a cluster-randomized trial in Orissa, India. *Emerg Themes*  
36 *Epidemiol* 2012;**9**:7.  
37  
38 65 Pickering AJ, Davis J. Freshwater availability and water fetching distance affect child  
39 health in sub-Saharan Africa. *Environ Sci Technol* 2012;**46**:2391–7.  
40  
41 66 VanDerslice J, Briscoe J. Environmental interventions in developing countries: interactions  
42 and their implications. *Am J Epidemiol* 1995;**141**:135–44.  
43  
44 67 Briscoe J. Intervention studies and the definition of dominant transmission routes. *Am J*  
45 *Epidemiol* 1984;**120**:449–55.  
46  
47 68 Eisenberg JNS, Scott JC, Porco T. Integrating disease control strategies: balancing water  
48 sanitation and hygiene interventions to reduce diarrheal disease burden. *Am J Public*  
49 *Health* 2007;**97**:846–52.  
50  
51 69 Fewtrell L, Colford JM, Kaufmann RB, *et al.* Water, sanitation, and hygiene interventions to  
52 reduce diarrhoea in less developed countries: a systematic review and meta-analysis.  
53 *Lancet Infect Dis* 2005;**5**:42–52.  
54  
55  
56

- 1  
2  
3 70 Loevinsohn BP. Health education interventions in developing countries: a methodological  
4 review of published articles. *Int J Epidemiol* 1990;**19**:788–94.  
5  
6  
7 71 Scrimshaw NS, Taylor CE, Gordon JE. Interactions of Nutrition and Infection. World Health  
8 Organization 1968.  
9  
10 72 McDade TW. Life history theory and the immune system: steps toward a human ecological  
11 immunology. *Am J Phys Anthropol* 2003;**Suppl 37**:100–25.  
12  
13 73 Mondal D, Minak J, Alam M, *et al.* Contribution of enteric infection, altered intestinal barrier  
14 function, and maternal malnutrition to infant malnutrition in Bangladesh. *Clin Infect Dis*  
15 2012;**54**:185–92.  
16  
17 74 Petri WA, Guerrant RL, Miller M, *et al.* Enteric infections, diarrhea, and their impact on  
18 function and development. *J Clin Invest* 2008;**118**:1277–90.  
19  
20 75 Trehan I, Goldbach HS, LaGrone LN, *et al.* Antibiotics as part of the management of  
21 severe acute malnutrition. *N Engl J Med* 2013;**368**:425–35.  
22  
23 76 Kielmann AA, Taylor CE, DeSweemer C, *et al.* The Narangwal experiment on interactions  
24 of nutrition and infections□: II. Morbidity and mortality effects. *Indian J Med Res* 1978;**68**  
25 **Suppl**:21–41.  
26  
27 77 Parker RL, Taylor CE, Kielmann AA, *et al.* The Narangwal experiment on interactions of  
28 nutrition and infections□: III. Measurement of services and costs and their relation to  
29 outcome. *Indian J Med Res* 1978;**68 Suppl**:42–54.  
30  
31 78 Taylor CE, Kielmann AA, DeSweemer C, *et al.* The Narangwal experiment on interactions  
32 of nutrition and infections□: I. Project design and effects upon growth. *Indian J Med Res*  
33 1978;**68 Suppl**:1–20.  
34  
35 79 Alive & Thrive. Bangladesh IYCF community model: operations manual. Dhaka,  
36 Bangladesh: : Alive & Thrive 2012.  
37  
38 80 PAHO/WHO. Guiding principles for complementary feeding of the breastfed child. Pan-  
39 American Health Organization (PAHO) 2003.  
40 [http://www.who.int/child\\_adolescent\\_health/documents/a85622/](http://www.who.int/child_adolescent_health/documents/a85622/)  
41  
42 81 Unicef. Program Guide for Infant and Young Child Feeding Practices. Unicef 2011.  
43  
44 82 Markovitz AR, Goldstick JE, Levy K, *et al.* Where science meets policy: comparing  
45 longitudinal and cross-sectional designs to address diarrhoeal disease burden in the  
46 developing world. *Int J Epidemiol* 2012;**41**:504–13.  
47  
48 83 Morris SS, Santos CA, Barreto ML, *et al.* Measuring the burden of common morbidities:  
49 sampling disease experience versus continuous surveillance. *Am J Epidemiol*  
50 1998;**147**:1087–92.  
51  
52 84 Luby SP, Gupta SK, Sheikh MA, *et al.* Tubewell water quality and predictors of  
53 contamination in three flood-prone areas in Bangladesh. *J Appl Microbiol* 2008;**105**:1002–  
54 8.  
55  
56

- 1  
2  
3 85 Kremer M, Leino J, Miguel E, *et al*. Spring Cleaning: Rural Water Impacts, Valuation, and  
4 Property Rights Institutions. *Quart J Econ* 2011;**126**:145–205.  
5  
6  
7 86 Clasen T, Edmondson P. Sodium dichloroisocyanurate (NaDCC) tablets as an alternative  
8 to sodium hypochlorite for the routine treatment of drinking water at the household level. *Int*  
9 *J Hyg Environ Health* 2006;**209**:173–81.  
10  
11 87 Kremer M, Miguel E, Null C, *et al*. Sustainability of Long-Term Take-Up at Point-of-  
12 Collection Chlorine Dispensers Provided Free of Charge in Rural Western Kenya.  
13 *Proceedings of the Water Environment Federation* 2011;**2011**:249–50.  
14  
15 88 Sultana R, Mondal UK, Rimi NA, *et al*. An improved tool for household faeces  
16 management in rural Bangladeshi communities. *Trop Med Int Health* 2013;**18**:854–60.  
17  
18 89 Watt J. The Tippy Tap: a simple handwashing device for rural areas. *J Trop Pediatr*  
19 1988;**34**:91–2.  
20  
21  
22 90 Luby SP, Halder AK, Huda T, *et al*. The effect of handwashing at recommended times with  
23 water alone and with soap on child diarrhea in rural Bangladesh: an observational study.  
24 *PLoS Med* 2011;**8**:e1001052.  
25  
26  
27 91 Curtis VA, Danquah LO, Aunger RV. Planned, motivated and habitual hygiene behaviour:  
28 an eleven country review. *Health Educ Res* 2009;**24**:655–73.  
29  
30  
31 92 Arimond M, Zeilani M, Jungjohann S, *et al*. Considerations in developing lipid-based  
32 nutrient supplements for prevention of undernutrition: experience from the International  
33 Lipid-Based Nutrient Supplements (iLiNS) Project. *Matern Child Nutr* Published Online  
34 First: May 2013. doi:10.1111/mcn.12049  
35  
36 93 Galpin L, Thakwalakwa C, Phuka J, *et al*. Breast milk intake is not reduced more by the  
37 introduction of energy dense complementary food than by typical infant porridge. *J Nutr*  
38 2007;**137**:1828–33.  
39  
40 94 Owino VO, Bahwere P, Bisimwa G, *et al*. Breast-milk intake of 9-10-mo-old rural infants  
41 given a ready-to-use complementary food in South Kivu, Democratic Republic of Congo.  
42 *Am J Clin Nutr* 2011;**93**:1300–4.  
43  
44 95 Cogill B. Anthropometric indicators measurement guide. Washington, D.C.: : Food and  
45 Nutrition Technical Assistance Project, Academy for Educational Development 2003.  
46  
47 96 De Onis M, Onyango AW, Broeck JV den, *et al*. Measurement and standardization  
48 protocols for anthropometry used in the construction of a new international growth  
49 reference. *Food Nutr Bull* 2004;**25**:S27–S36.  
50  
51 97 Ayele B, Aemere A, Gebre T, *et al*. Reliability of measurements performed by community-  
52 drawn anthropometrists from rural Ethiopia. *PLoS One* 2012;**7**:e30345.  
53  
54 98 Baqui AH, Black RE, Yunus M, *et al*. Methodological issues in diarrhoeal diseases  
55 epidemiology: definition of diarrhoeal episodes. *Int J Epidemiol* 1991;**20**:1057–63.  
56  
57  
58  
59  
60

- 1  
2  
3 99 Arnold BF, Galiani S, Ram PK, *et al.* Optimal Recall Period for Caregiver-reported Illness  
4 in Risk Factor and Intervention Studies: A Multicountry Study. *Am J Epidemiol*  
5 2013;**177**:361–70.  
6  
7  
8 100 Schmidt W-P, Arnold BF, Boisson S, *et al.* Epidemiological methods in diarrhoea studies -  
9 an update. *Int J Epidemiol* 2011;**40**:1678–92.  
10  
11 101 Bricker D, Squires J. *Ages and Stages Questionnaires: A Parent Completed, Child*  
12 *Monitoring System*. 2nd ed. Brookes: Baltimore, MD 1999.  
13  
14 102 Fernald LCH, Kariger P, Hidrobo M, *et al.* Socioeconomic gradients in child development in  
15 very young children: Evidence from India, Indonesia, Peru, and Senegal. *Proc Natl Acad*  
16 *Sci U S A* Published Online First: October 2012. doi:10.1073/pnas.1121241109  
17  
18 103 Barboza MS, Silvia TMJ, Guerrant RL, *et al.* Measurement of intestinal permeability using  
19 mannitol and lactulose in children with diarrheal diseases. *Braz J Med Biol Res*  
20 1999;**32**:1499–504.  
21  
22 104 Wagner M, Peterson CGB, Ridefelt P, *et al.* Fecal markers of inflammation used as  
23 surrogate markers for treatment outcome in relapsing inflammatory bowel disease. *World J*  
24 *Gastroenterol* 2008;**14**:5584–9; discussion 5588.  
25  
26 105 Bernier JJ, Florent C, Desmazes C, *et al.* Diagnosis of protein-losing enteropathy by  
27 gastrointestinal clearance of alpha1-antitrypsin. *Lancet* 1978;**2**:763–4.  
28  
29 106 Campbell DI, McPhail G, Lunn PG, *et al.* Intestinal inflammation measured by fecal  
30 neopterin in Gambian children with enteropathy: association with growth failure, *Giardia*  
31 *lamblia*, and intestinal permeability. *J Pediatr Gastroenterol Nutr* 2004;**39**:153–7.  
32  
33 107 Katz N, Chaves A, Pellegrino J. A simple device for quantitative stool thick-smear  
34 technique in Schistosomiasis mansoni. *Rev Inst Med Trop Sao Paulo* 1972;**14**:397–400.  
35  
36 108 Duflo E, Glennerster R, Kremer M. Using Randomization in Development Economics  
37 Research: A Toolkit. In: Schultz TP, Strauss JA, eds. *Handbook of Development*  
38 *Economics*. Elsevier 2007. 3895–962.  
39  
40 109 Arnold B, Hogan D, Colford J, *et al.* Simulation methods to estimate design power: an  
41 overview for applied research. *BMC Med Res Methodol* 2011;**11**:94.  
42  
43 110 Huda TMN, Unicomb L, Johnston RB, *et al.* Interim evaluation of a large scale sanitation,  
44 hygiene and water improvement programme on childhood diarrhea and respiratory disease  
45 in rural Bangladesh. *Soc Sci Med* 2012;**75**:604–11.  
46  
47 111 Waddington H, Snilstveit B. Effectiveness and sustainability of water, sanitation, and  
48 hygiene interventions in combating diarrhoea. *J Dev Eff* 2009;**1**:295–335.  
49  
50 112 Fleiss J. *The design and analysis of clinical experiments*. Wiley: New York 1986.  
51  
52 113 Marschner IC. Optimal design of clinical trials comparing several treatments with a control.  
53 *Pharm Stat* 2007;**6**:23–33.  
54  
55  
56  
57  
58  
59  
60

- 1  
2  
3 114 Schulz KF, Altman DG, Moher D, *et al.* CONSORT 2010 statement: updated guidelines for  
4 reporting parallel group randomised trials. *PLoS Med* 2010;**7**.  
5 doi:<http://dx.doi.org/10.1371/journal.pmed.1000251>  
6
- 7 115 Moher D, Hopewell S, Schulz KF, *et al.* CONSORT 2010 explanation and elaboration:  
8 updated guidelines for reporting parallel group randomised trials. *BMJ* 2010;**340**:c869.  
9
- 10 116 Brookes ST, Whitely E, Egger M, *et al.* Subgroup analyses in randomized trials: risks of  
11 subgroup-specific analyses; power and sample size for the interaction test. *J Clin*  
12 *Epidemiol* 2004;**57**:229–36.  
13
- 14 117 Fisher R. *Statistical Methods for Research Workers*. ISBN 0-05-002170-2 1925.  
15
- 16 118 Gail MH, Mark SD, Carroll RJ, *et al.* On design considerations and randomization-based  
17 inference for community intervention trials. *Stat Med* 1996;**15**:1069–92.  
18
- 19 119 Feng Z, Diehr P, Peterson A, *et al.* Selected statistical issues in group randomized trials.  
20 *Annu Rev Public Health* 2001;**22**:167–87.  
21
- 22 120 Rosenbaum PR. Covariance adjustment in randomized experiments and observational  
23 studies. *Statistical Science* 2002;**17**:286–304.  
24
- 25 121 Small DS, Ten Have TR, Rosenbaum PR. Randomization inference in a group-randomized  
26 trial of treatments for depression: Covariate adjustment, noncompliance, and quantile  
27 effects. *Journal of the American Statistical Association* 2008;**103**:271–9.  
28
- 29 122 Imbens GW, Wooldridge JM. Recent developments in the econometrics of program  
30 evaluation. *J Econ Lit* 2009;**47**:5–86.  
31
- 32 123 Rothman KJ, Greenland S, Lash TL. *Modern Epidemiology*. 3rd ed. Philadelphia: :  
33 Lippincott Williams and Wilkins 2008.  
34
- 35 124 Schulz KF, Grimes DA. Multiplicity in randomised trials I: endpoints and treatments. *Lancet*  
36 2005;**365**:1591–5.  
37
- 38 125 Pocock SJ, Assmann SE, Enos LE, *et al.* Subgroup analysis, covariate adjustment and  
39 baseline comparisons in clinical trial reporting: current practice and problems. *Stat Med*  
40 2002;**21**:2917–30.  
41
- 42 126 Van der Laan MJ, Polley EC, Hubbard AE. Super learner. *Stat Appl Genet Mol Biol*  
43 2007;**6**:Article 25.  
44
- 45 127 Horowitz JL, Manski CF. Nonparametric Analysis of Randomized Experiments with Missing  
46 Covariate and Outcome Data. *Journal of the American Statistical Association* 2000;**95**:77–  
47 84.  
48
- 49 128 Lee DS. Training, Wages, and Sample Selection: Estimating Sharp Bounds on Treatment  
50 Effects. *Rev Econ Studies* 2009;**76**:1071–102.  
51
- 52 129 Hernan MA, Hernandez-Diaz S, Robins JM. A structural approach to selection bias.  
53 *Epidemiology* 2004;**15**:615–25.  
54  
55  
56  
57  
58  
59  
60



- 1  
2  
3 130 Geller NL, Pocock SJ. Interim analyses in randomized clinical trials: ramifications and  
4 guidelines for practitioners. *Biometrics* 1987;**43**:213–23.  
5  
6  
7 131 Schulz KF, Grimes DA. Multiplicity in randomised trials II: subgroup and interim analyses.  
8 *Lancet* 2005;**365**:1657–61.  
9  
10 132 Emanuel EJ, Wendler D, Grady C. What makes clinical research ethical? *JAMA*  
11 2000;**283**:2701–11.  
12  
13  
14  
15  
16  
17  
18  
19  
0  
1  
2  
2  
2  
2  
2  
2  
2  
2  
2  
30  
31  
32  
33  
34  
35  
36  
37  
38  
39  
0  
4  
2  
2  
4  
4  
5  
6  
7  
8  
9  
0  
1  
2  
3  
4  
5  
6  
7  
8  
9  
0

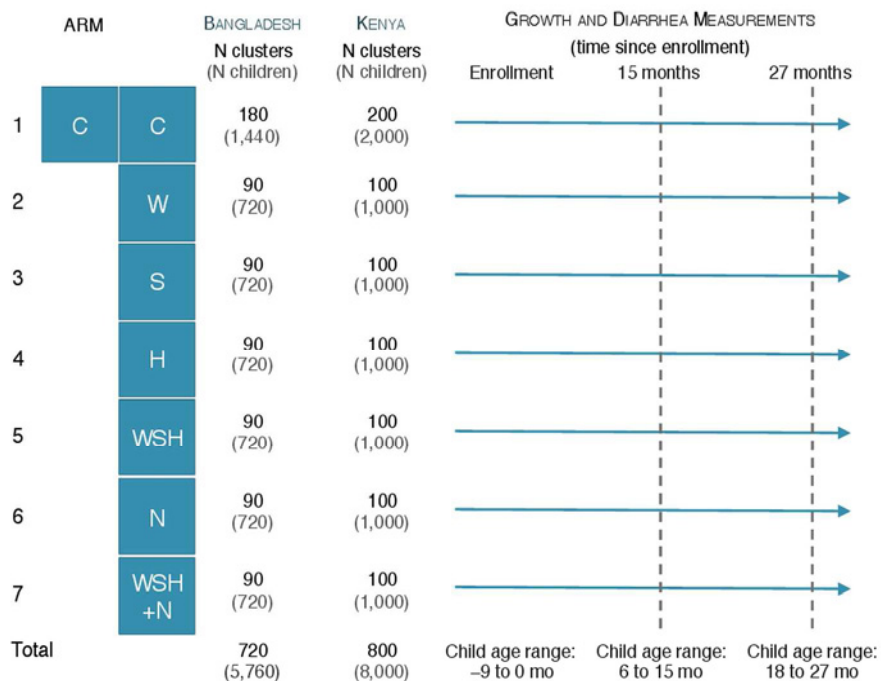

Figure 1.

Summary of the overall study design in both countries, including cluster and target child enrollment in each arm. Growth and diarrhea measurements will take place at 15- and 27-months following enrollment, which corresponds to 12- and 24- months following initial intervention delivery due to a 3-month lag between enrollment and intervention implementation. Abbreviations for intervention arms: C = control; W = improved water quality; S = improved sanitation; H = improved handwashing; WSH = combined improvements in water quality, sanitation, and handwashing; N = improved nutrition; WSH+N = combined improvements in water quality, sanitation, handwashing, and nutrition.

295x228mm (300 x 300 DPI)

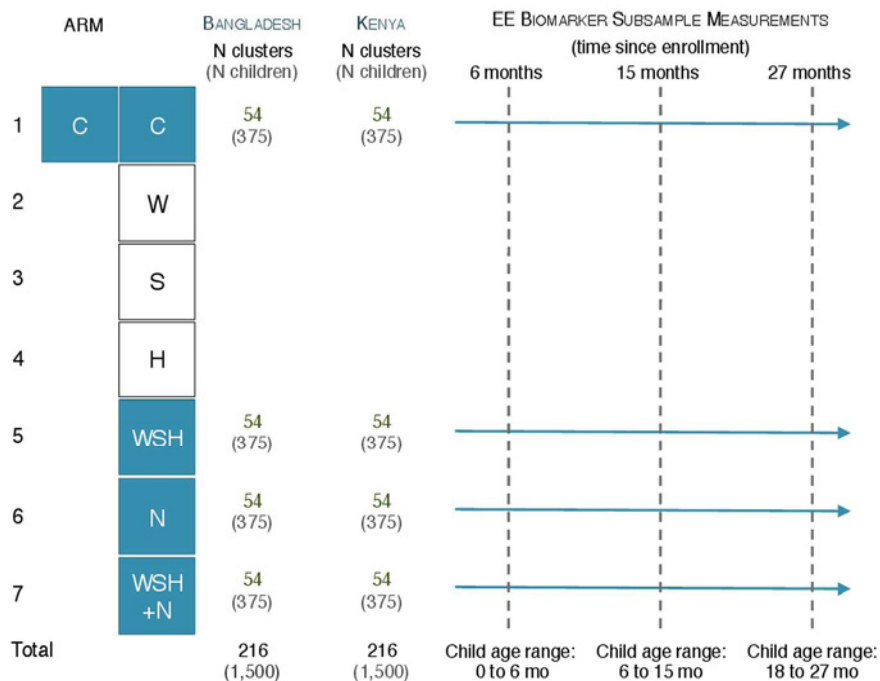

Figure 2.

Summary of the environmental enteropathy (EE) subsample in both countries, including cluster and target child enrollment in each arm. The EE subsample includes an equal number of clusters and target children from 4 arms of the study. Abbreviations for intervention arms: C = control; W = improved water quality; S = improved sanitation; H = improved handwashing; WSH = combined improvements in water quality, sanitation, and handwashing; N = improved nutrition; WSH+N = combined improvements in water quality, sanitation, handwashing, and nutrition.

295x228mm (300 x 300 DPI)

only

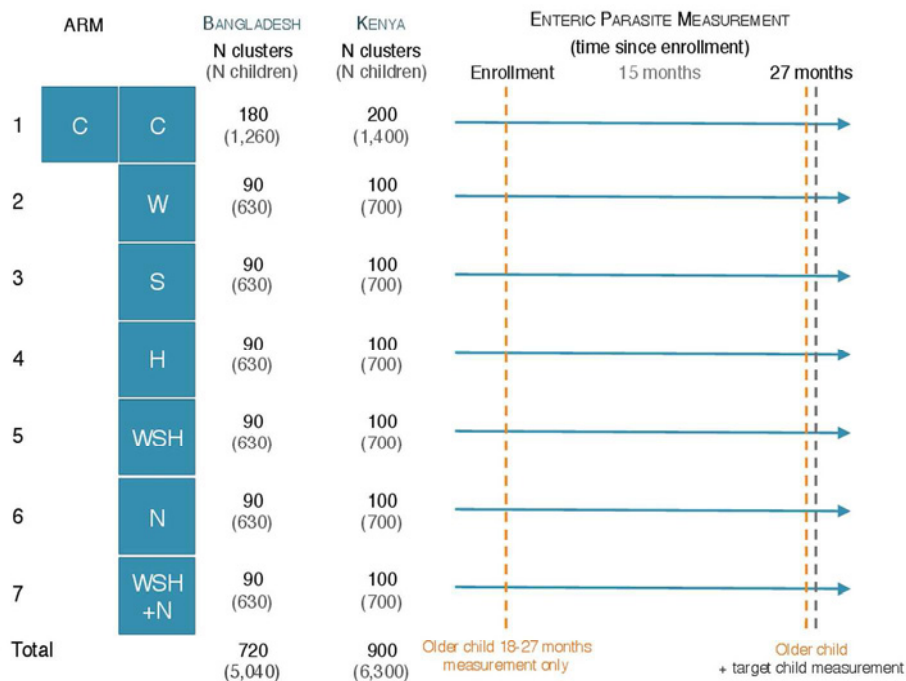

Figure 3.

Summary of enteric parasite measurement in both countries, including cluster and target child enrollment in each arm. At enrollment stool specimens will be collected from an older sibling aged 18-27 months if present and will be tested for protozoan infections. At the final measurement, specimens will be collected from the same older siblings plus 7 target children per cluster in each country, and analyzed for protozoan infections and soil transmitted helminth infections. Abbreviations for intervention arms: C = control; W = improved water quality; S = improved sanitation; H = improved handwashing; WSH = combined improvements in water quality, sanitation, and handwashing; N = improved nutrition; WSH+N = combined improvements in water quality, sanitation, handwashing, and nutrition.

295x228mm (300 x 300 DPI)

Cluster-randomized controlled trials of individual and combined water, sanitation, hygiene, and nutritional interventions in rural Bangladesh and Kenya: The WASH Benefits Study design and rationale

**Appendix 1.** Nutrient Content of the Lipid-based Nutrient Supplement (LNS) used in WASH Benefits compared to the WHO/FAO Recommended Nutrient Intakes (RNI) [1] for children 1-3 years

| Nutrient               | Unit | WHO/FAO<br>RNIs for<br>children 1-3 y* | LNS nutrient content |       |                             |
|------------------------|------|----------------------------------------|----------------------|-------|-----------------------------|
|                        |      |                                        | Content              | % RNI | Chemical form               |
| Daily Dose‡            | g    |                                        | 20                   |       |                             |
| Energy                 | kcal |                                        | 118                  |       |                             |
| Fat                    | g    |                                        | 9.6                  |       |                             |
| Linoleic acid          | g    |                                        | 4.46                 |       |                             |
| Alpha-linolenic acid   | g    |                                        | 0.58                 |       |                             |
| Ratio of LA to ALA     |      |                                        | 7.7                  |       |                             |
| Protein                | g    |                                        | 2.6                  |       |                             |
| <b><u>Vitamins</u></b> |      |                                        |                      |       |                             |
| Vitamin A              | µg   | 400                                    | 400                  | 100%  | Retynyl acetate             |
| Vitamin D              | µg   | 5                                      | 5                    | 100%  | Cholecalciferol (D3)        |
| Vitamin E              | mg   | 5                                      | 6                    | 120%  | DL-alpha-tocopherol acetate |
| Vitamin K              | µg   | 15                                     | 30                   | 200%  | Phylloquinone 5%            |
| Vitamin C              | mg   | 30                                     | 30                   | 100%  | L-ascorbic acid             |
| Biotin                 | µg   | 8                                      | NA                   |       |                             |
| Folic acid             | µg   | 150                                    | 150                  | 100%  | Pteroyl monoglutamic acid   |
| Thiamine (B1)          | mg   | 0.5                                    | 0.5                  | 100%  | Thiamin hydrochloride       |
| Riboflavin (B2)        | mg   | 0.5                                    | 0.5                  | 100%  | Riboflavin                  |
| Niacin                 | mg   | 6                                      | 6                    | 100%  | Niacinamide                 |
| Pantothenic acid (B5)  | mg   | 2                                      | 2                    | 100%  | Calcium pantothenate        |
| Vitamin B6             | mg   | 0.5                                    | 0.5                  | 100%  | Pyridoxine hydrochloride    |
| Vitamin B12            | µg   | 0.9                                    | 0.9                  | 100%  | Cyanocobalamin (0.1%)       |

1  
2  
3  
4  
5  
6  
7  
8  
9  
10  
11  
12  
13  
14  
15  
16  
17  
18  
19  
20  
21  
22  
23  
24  
25  
26  
27  
28  
29  
30  
31  
32  
33  
34  
35  
36  
37  
38  
39  
40  
41  
42  
43  
44  
45  
46  
47  
48  
49  
50

| Nutrient               | Unit | WHO/FAO RNI for children 1-3 y* | LNS nutrient content |       |                                                                          |
|------------------------|------|---------------------------------|----------------------|-------|--------------------------------------------------------------------------|
|                        |      |                                 | Content              | % RNI | Chemical form                                                            |
| <b><i>Minerals</i></b> |      |                                 |                      |       |                                                                          |
| Calcium§               | mg   | 500                             | 280                  | 56%   | Tri-calcium phosphate                                                    |
| Copper¶                | mg   | 0.34                            | 0.34                 | 100%  | Encapsulated copper sulfate                                              |
| Iodine                 | µg   | 90                              | 90                   | 100%  | Potassium iodate                                                         |
| Iron**                 | mg   | 11.6                            | 9                    | 78%   | Encapsulated ferrous sulfate (Bangladesh)<br>Ferrous fumarate (Kenya) †† |
| Magnesium§             | mg   | 60                              | 40                   | 67%   | Magnesium citrate                                                        |
| Manganese              | mg   | 1.2                             | 1.2                  | 100%  | Manganeze sulfate                                                        |
| Phosphorous§           | mg   | 460                             | 190                  | 41%   | Tri-calcium phosphate & Di-potassium phosphate                           |
| Potassium              | mg   |                                 | 200                  |       | Di-potassium phosphate & potassium chloride                              |
| Selenium               | µg   | 17                              | 20                   | 118%  | Sodium selenite 1.5%                                                     |
| Zinc**                 | mg   | 8.3                             | 8                    | 96%   | Zinc sulfate                                                             |

\*RNI=Recommended Nutrient Intake; LNS=Lipid-based nutrient supplement; RDA=Recommended Dietary Allowance; WHO = World Health Organization; FAO = Food and Agriculture Organization of the United Nations

‡ In malaria endemic areas, it is recommended that the supplement be split into two 10 g servings in one day to reduce the iron consumed in a single bolus dose. Although malaria is less common in Bangladesh, we recommend children consume two 10 g sachets per day in both trials.

§ The calcium, phosphorus, and magnesium content of LNS do not meet 100% of the RNI for technical reasons

¶ The Institute of Medicine RDA level for copper for infants 1-3 y is shown here [2].

\*\* The RNI for iron and zinc is that assumed under a diet of low bioavailability.

†† Bangladesh will use encapsulated ferrous sulfate, similar to other LNS products on the market. Ferrous fumarate will be used in Kenya due to an interaction between ferrous sulfate and polyphenols in the commonly consumed millet flour.

**References**

[1] WHO and FAO, *Vitamin and Mineral Requirements in Human Nutrition*. Second Edition ed. 2004, Geneva, Switzerland: World Health Organization.

[2] Institute of Medicine, *Dietary Reference Intakes: The essential guide to nutrient requirements*. 2006, Washington, DC: National Academies Press.

Cluster-randomized controlled trials of individual and combined water, sanitation, hygiene, and nutritional interventions in rural Bangladesh and Kenya: The WASH Benefits Study design and rationale

**Appendix 2.** Critical Benchmarks for Intervention Monitoring

The principal and co-principal investigators will carefully review the intervention fidelity assessments and identify any areas of low uptake of interventions. Critical benchmarks for uptake based on unannounced visits are summarized below for each country.

While unlikely, it is also possible that the study promoters will be implementing the intervention precisely as planned, but uptake is lower than expected. If uptake is below the benchmark in the setting where implementation followed the prescribed approach, the qualitative team in each country will conduct more in-depth evaluation will be framed around the behavior change models guiding the intervention design.

**Bangladesh critical benchmarks**

| Intervention           | Indicator                                                                                                                                                                                                                                                                                                      | Benchmark |
|------------------------|----------------------------------------------------------------------------------------------------------------------------------------------------------------------------------------------------------------------------------------------------------------------------------------------------------------|-----------|
| Overall implementation | Participant reports a promoter visit in the past 28 days to deliver messages about the intervention                                                                                                                                                                                                            | 90%       |
| Water quality          | Households with children 6 – 24 months of age have stored chlorinated drinking water (measured by residual chlorine)                                                                                                                                                                                           | 65%       |
| Sanitation             | Among participants with a child under 36 months, the participant reports that the youngest child's most recent defecation was either directly into the latrine or the feces were disposed of into the latrine (based on open-ended questions about where the child defecated and what was done with the feces) | 65%       |
|                        | Sani-scoop easily accessible to mother                                                                                                                                                                                                                                                                         | 80%       |
|                        | Households in the bari have a latrine with a functional water seal                                                                                                                                                                                                                                             | 80%       |
| Handwashing            | Households have at least one handwashing station with soap and water present                                                                                                                                                                                                                                   | 65%       |
| Nutrition              | Within households with targeted children > 6 months of age, the stock of LNS sachets is consistent with the daily use of two sachets per day based on records of the last distribution and the number of sachets currently observed in the home.                                                               | 70%       |
|                        | Report hearing any messages on infant/child nutrition and or Sonamoni (lipid based nutrient supplement)                                                                                                                                                                                                        | 80%       |

## Kenya critical benchmarks

| Intervention           | Indicator                                                                                                                                                                                                                                                                                                       | Benchmark |
|------------------------|-----------------------------------------------------------------------------------------------------------------------------------------------------------------------------------------------------------------------------------------------------------------------------------------------------------------|-----------|
| Overall implementation | Participant reports a promoter visit in the past 28 days to deliver messages about the intervention                                                                                                                                                                                                             | 90%       |
|                        | Mid-upper arm circumference recorded in the past 28 days based on caregiver's tracking booklet                                                                                                                                                                                                                  | 90%       |
| Water quality          | Drinking water stored in the participant's home has residual chlorine                                                                                                                                                                                                                                           | 65%       |
| Sanitation             | Latrine cover observed over the hole in the primary latrine used by the participant                                                                                                                                                                                                                             | 65%       |
|                        | Among participants with a child under 36 months, the participant reports that the youngest child's most recent defecation was either directly into the latrine or the feces were disposed of into the latrine (based on open-ended questions about where the child defecated and what was done with the feces). | 65%       |
| Handwashing            | Soapy water and rinse water are observed at one or more tippy taps in participant's compound                                                                                                                                                                                                                    | 65%       |
| Nutrition              | Within households with targeted children > 6 months of age, the stock of LNS sachets is consistent with the daily use of two sachets per day based on records of the last distribution and the number of sachets currently observed in the home.                                                                | 70%       |



Cluster-randomized controlled trials of individual and combined water, sanitation, hygiene, and nutritional interventions in rural Bangladesh and Kenya: The WASH Benefits Study design and rationale

**Appendix 3.** Tertiary outcomes.

|   | <b>Tertiary Outcome</b>                          | <b>Population</b> | <b>Definition</b>                                                                                                          | <b>Measurement</b>                                                                                                                  | <b>Citation</b> |
|---|--------------------------------------------------|-------------------|----------------------------------------------------------------------------------------------------------------------------|-------------------------------------------------------------------------------------------------------------------------------------|-----------------|
| 1 | Weight-for-age at 1 year and 2 years             | Target children   | Child's weight standardized to Z-scores using the WHO 2006 growth standards                                                | Weight measured after 1 and 2 years of intervention.                                                                                | [1–4]           |
| 2 | Weight-for-height at 1 year and 2 years          | Target children   | Child's weight and length standardized to Z-scores using the WHO 2006 growth standards                                     | Weight and length measured after 1 and 2 years of intervention.                                                                     | [1–3]           |
| 3 | Underweight at 2 years                           | Target children   | Weight-for-age $Z < -2$ at the year-2 measurement.                                                                         | Weight measured after 2 years of intervention.                                                                                      | [1–3]           |
| 4 | Wasted at 2 years                                | Target children   | Weight-for-height $< -2$ at the year-2 measurement.                                                                        | Weight and length measured after 2 years of intervention.                                                                           | [1–3]           |
| 5 | Severely stunted at 2 years                      | Target children   | Length-for-age $Z < -3$ at the year-2 measurement.                                                                         | Severe stunting classification is based on the WHO 2006 standard.                                                                   | [1–3]           |
| 6 | Head circumference-for-age at 1 year and 2 years | Target children   | Child's weight standardized to Z-scores using the WHO 2006 growth standards, measured after 1 and 2 years of intervention. | Head circumference measured after 1 and 2 years of intervention.                                                                    | [1–3]           |
| 7 | Soil transmitted helminth infection at 2 years   | Target children   | <i>Ascaris</i> , <i>Trichuris</i> , and Hookworm eggs present in a single stool sample.                                    | Kato-Katz microscopy on preserved stool samples.                                                                                    | [5]             |
| 8 | Protozoan infection at 2 years                   | Target children   | <i>Giardia</i> , <i>Cryptosporidium</i> , and <i>Entamoeba histolytica</i> present in a single stool sample.               | <i>Giardia</i> , <i>Cryptosporidium</i> , and <i>E. histolytica</i> TechLab ELISA test (Kenya) or real time qPCR assay (Bangladesh) | [6]             |

|    | <b>Tertiary Outcome</b>                              | <b>Population</b>                     | <b>Definition</b>                                                                                                                                   | <b>Measurement</b>                                                                                                                  | <b>Citation</b> |
|----|------------------------------------------------------|---------------------------------------|-----------------------------------------------------------------------------------------------------------------------------------------------------|-------------------------------------------------------------------------------------------------------------------------------------|-----------------|
| 9  | Soil transmitted helminth infection at 2 years       | Children 18 – 27 months at enrollment | <i>Ascaris</i> , <i>Trichuris</i> , and Hookworm eggs present in a single stool sample.                                                             | Kato-Katz microscopy on preserved stool samples.                                                                                    | [5]             |
| 10 | Protozoan infection at 2 years                       | Children 18 – 27 months at enrollment | <i>Giardia</i> , <i>Cryptosporidium</i> , and <i>Entamoeba histolytica</i> present in a single stool sample.                                        | <i>Giardia</i> , <i>Cryptosporidium</i> , and <i>E. histolytica</i> TechLab ELISA test (Kenya) or real time qPCR assay (Bangladesh) | [6]             |
| 11 | Verbal Communicative Development Inventory at 1 year | Target children                       | CDI score                                                                                                                                           | CDI measured using linguistically adapted instruments that are rely on caregiver report (Bangladesh only).                          | [7]             |
| 12 | WHO motor milestones at 1 year                       | Target children                       | Six milestones: sitting without support, hands-and-knees crawling, standing with assistance, walking with assistance, standing alone, walking alone | Measured using caregiver report and demonstration to fieldworker.                                                                   | [8]             |
| 13 | Acute upper respiratory illness                      | Children < 36 months at enrollment    | Constant cough or difficulty breathing                                                                                                              | Caregiver-reported symptoms with 2 day and 7 day recall, measured after 1 year and 2 years of intervention.                         | [9]             |
| 14 | All cause mortality                                  | Target children                       | Mortality during follow-up                                                                                                                          | Mortality confirmed by the caregiver and head of household between enrollment and 2 years of intervention.                          |                 |

## Appendix References

1. Cogill B (2003) Anthropometric indicators measurement guide. Washington, D.C.: Food and Nutrition Technical Assistance Project, Academy for Educational Development.
2. De Onis M, Onyango AW, Broeck JV den, Chumlea WC, Martorell R (2004) Measurement and standardization protocols for anthropometry used in the construction of a new international growth reference. *Food Nutr Bull* 25: S27–S36.
3. WHO (2006) WHO Child Growth Standards: Length/height-for-age, weight-for-age, weight-for-length, weight-for-height and body mass index-for-age: Methods and developments.
4. Schmidt W-P, Boisson S, Genser B, Barreto ML, Baisley K, et al. (2010) Weight-for-age z-score as a proxy marker for diarrhoea in epidemiological studies. *J Epidemiol Community Heal* 64: 1074–1079. doi:10.1136/jech.2009.099721.
5. Katz N, Chaves A, Pellegrino J (1972) A simple device for quantitative stool thick-smear technique in *Schistosomiasis mansoni*. *Rev Inst Med Trop Sao Paulo* 14: 397–400.
6. Haque R, Roy S, Siddique A, Mondal U, Rahman SMM, et al. (2007) Multiplex real-time PCR assay for detection of *Entamoeba histolytica*, *Giardia intestinalis*, and *Cryptosporidium* spp. *Am J Trop Med Hyg* 76: 713–717.
7. Hamadani JD, Baker-Henningham H, Tofail F, Mehrin F, Huda SN, et al. (2010) Validity and reliability of mothers' reports of language development in 1-year-old children in a large-scale survey in Bangladesh. *Food Nutr Bull* 31: S198–S206.
8. WHO (2006) WHO Motor Development Study: windows of achievement for six gross motor development milestones. *Acta Paediatr Suppl* 450: 86–95.
9. Gove S (1997) Integrated management of childhood illness by outpatient health workers: technical basis and overview. The WHO Working Group on Guidelines for Integrated Management of the Sick Child. *Bull World Heal Organ* 75 Suppl 1: 7–24.

1  
2  
3 Cluster-randomized controlled trials of individual and combined water, sanitation,  
4 hygiene, and nutritional interventions in rural Bangladesh and Kenya: The WASH  
5 Benefits Study design and rationale  
6  
7

8 **Appendix 4.** Assumptions used to calculate minimum detectable effects  
9

10 All of the calculations assume a Type I error ( $\alpha$ ) of 0.05, power ( $1-\beta$ ) of 0.8, a one-sided test  
11 for a two-sample comparison of means, and 10% dropout after baseline. The length-for-age Z-  
12 score (LAZ) calculations used a standard equation assuming a single, post-treatment  
13 measurement at 2 years.<sup>1</sup> Since the diarrhea outcome measurement includes a partial baseline  
14 (target children will be in utero at baseline, but their older siblings will be present) and multiple  
15 levels of correlation (within-child, within-cluster), we used a simulation-based approach.<sup>2,3</sup>  
16  
17  
18  
19

20 **Appendix References**  
21  
22

- 23 1 Duflo E, Glennerster R, Kremer M. Using Randomization in Development Economics  
24 Research: A Toolkit. In: Schultz TP, Strauss JA, eds. *Handbook of Development Economics*.  
25 Elsevier 2007. 3895–962.  
26  
27 2 Feiveson AH. Power by simulation. *Stata Journal* 2002;**2**:107–24.  
28  
29 3 Arnold B, Hogan D, Colford J, *et al*. Simulation methods to estimate design power: an  
30 overview for applied research. *BMC Med Res Methodol* 2011;**11**:94.  
31  
32 4 Huda TMN, Unicomb L, Johnston RB, *et al*. Interim evaluation of a large scale sanitation,  
33 hygiene and water improvement programme on childhood diarrhea and respiratory disease in  
34 rural Bangladesh. *Soc Sci Med* 2012;**75**:604–11.  
35  
36 5 KNBS, ICF Macro. Kenya Demographic and Health Survey 2008-09. Kenya National Bureau  
37 of Statistics and ICF Macro 2010.  
38  
39 6 Kremer M, Leino J, Miguel E, *et al*. Spring Cleaning: Rural Water Impacts, Valuation, and  
40 Property Rights Institutions. *Quart J Econ* 2011;**126**:145–205.  
41  
42 7 Freeman J, Hutchison GB. Prevalence, incidence and duration. *Am J Ep* 1980;**112**:707–23.  
43  
44  
45  
46  
47  
48  
49  
50  
51  
52  
53  
54  
55  
56  
57  
58  
59  
60

## Bangladesh

We used the following assumptions to calculate minimum detectable effects (MDEs) for length-for-age and diarrhea in the Bangladesh trial:

|                                                                | Assumption | Source / rationale                                                                                                                  |
|----------------------------------------------------------------|------------|-------------------------------------------------------------------------------------------------------------------------------------|
| <b>Overall Design</b>                                          |            |                                                                                                                                     |
| Clusters in the control arm                                    | 180        | Double-sized control arm                                                                                                            |
| Clusters in each treatment arm                                 | 90         |                                                                                                                                     |
| <b>Length-for-age Z-score (LAZ)</b>                            |            |                                                                                                                                     |
| Baseline measurements                                          | 0          | Target children in utero at baseline                                                                                                |
| Post intervention measurements                                 | 1          | Primary outcome, measured at 2 years post-intervention (ages 18 - 27 mo)                                                            |
| Children per cluster                                           | 7          | Enrolling 8 children per cluster, but have conservatively assumed 7.                                                                |
| SD                                                             | 1.243      | SHEWA-B cohort, <sup>4</sup> children < 36 months                                                                                   |
| Cluster-level ICC                                              | 0.008      | SHEWA-B cohort, <sup>4</sup> children < 36 months                                                                                   |
| <b>Diarrhea</b>                                                |            |                                                                                                                                     |
| Baseline measurements                                          | 1          | Note: simulations assume no baseline for target children in the cohort.                                                             |
| Post intervention measurements                                 | 2          |                                                                                                                                     |
| Children per cluster                                           | 10         | SHEWA-B cohort <sup>4</sup> 1.45 children < 36 months, conditional on 1 child – 6 to 0 months in the household. $7 \times 1.4 = 10$ |
| Prevalence in control                                          | 12%        | SHEWA-B cohort <sup>4</sup> 2-day period prevalence for children < 36 months at enrollment = 12.5%                                  |
| Prevalence in single treatment arms<br>(for WSH vs. W   S   H) | 8%         | 33% relative reduction from 12% in control                                                                                          |
| Child-level standard deviation                                 | 0.618      | SHEWA-B cohort <sup>4</sup>                                                                                                         |
| Cluster-level standard deviation                               | 0.776      | SHEWA-B cohort <sup>4</sup>                                                                                                         |

Under these assumptions in Bangladesh, we calculated the LAZ MDE for a treatment versus control comparison equal to +0.15, and for a treatment versus treatment comparison equal to +0.18. The diarrhea MDE for a treatment versus control arm is equal to –3.1% (RR=0.74), and for the combined versus single intervention arms is equal to –2.4% (RR=0.70).

## Kenya

We used the following assumptions to calculate minimum detectable effects (MDEs) for length-for-age and diarrhea in the Kenya trial:

|                                                             | Assumption | Source / rationale                                                                                                                                                                                                                                                                    |
|-------------------------------------------------------------|------------|---------------------------------------------------------------------------------------------------------------------------------------------------------------------------------------------------------------------------------------------------------------------------------------|
| <b>Overall Design</b>                                       |            |                                                                                                                                                                                                                                                                                       |
| Clusters in the control arm                                 | 200        | Double-sized control arm                                                                                                                                                                                                                                                              |
| Clusters in each treatment arm                              | 100        |                                                                                                                                                                                                                                                                                       |
| <b>Length-for-age Z score (LAZ)</b>                         |            |                                                                                                                                                                                                                                                                                       |
| Baseline measurements                                       | 0          | Target children in utero at baseline                                                                                                                                                                                                                                                  |
| Post intervention measurements                              | 1          | Primary outcome, measured at 2 years post-intervention (ages 18 - 27 mo)                                                                                                                                                                                                              |
| Children per cluster                                        | 10         |                                                                                                                                                                                                                                                                                       |
| SD                                                          | 1.218      | WASH Benefits Kenya pilot study                                                                                                                                                                                                                                                       |
| Cluster-level ICC                                           | 0.07       | WASH Benefits Kenya pilot study                                                                                                                                                                                                                                                       |
| <b>Diarrhea</b>                                             |            |                                                                                                                                                                                                                                                                                       |
| Baseline measurements                                       | 1          | Note: simulations assume no baseline for target children in the cohort.                                                                                                                                                                                                               |
| Post intervention measurements                              | 2          |                                                                                                                                                                                                                                                                                       |
| Children per cluster                                        | 14         | Kenya 2008-9 DHS <sup>5</sup> 1.48 children < 36 months, conditional on 1 child – 6 to 3 months in the household. Used 1.4 because the DHS estimate is a slight over-estimate: it does not include women who have an eligible target child as their first birth. $10 \times 1.4 = 14$ |
| Prevalence in control                                       | 12%        | Rural Water Project control group <sup>6</sup> 1 day prevalence = 9.9%. Estimates of 2-day prevalence using standard methods <sup>7</sup> range from 12.2% - 13.7%.                                                                                                                   |
| Prevalence in single treatment arms (for WSH vs. W   S   H) | 8%         | 33% relative reduction from 12% in control                                                                                                                                                                                                                                            |
| Child-level standard deviation                              | 0.617      | Rural Water Project control group <sup>6</sup>                                                                                                                                                                                                                                        |
| Cluster-level standard deviation                            | 0.378      | Rural Water Project control group <sup>6</sup>                                                                                                                                                                                                                                        |

Under these assumptions in Kenya, we calculated the LAZ MDE for a treatment versus control comparison equal to +0.15, and for a treatment versus treatment comparison equal to +0.18. The diarrhea MDE for a treatment versus control arm is equal to -2.2% (RR=0.82), and for the combined versus single intervention arms is equal to -1.8% (RR=0.78).

Cluster-randomized controlled trials of individual and combined water, sanitation, hygiene, and nutritional interventions in rural Bangladesh and Kenya: The WASH Benefits Study design and rationale

**Appendix 5.** Pre-specified secondary analyses: treatment interactions, cross-cluster externalities, subgroup analyses.

### Tests of treatment interaction

The study is powered for the tests described in the main text. We chose to design the study around main effects and not these interaction tests because we expect the interactions, if present, to be small and thus difficult to detect in feasible designs. However, the design will enable us to test for large interactions between treatments (related to H2 and H3 in the main text). The rationale for including the interaction tests in our analysis plan is that if the interactions are large, they will be both detectable and scientifically important. Nonetheless, we recognize that the study will not have power to detect these interactions unless they are at least 2 times larger than the main effects.<sup>1</sup> This is because the interaction tests will rely on variance terms from more than 2 arms (in contrast to the parameters described in the main text). The interactions we describe below are on the additive scale.

The first interaction test is whether combined water quality, handwashing, and sanitation interventions improve our primary outcomes more (or less) than the additive effect of the components delivered separately. The null hypothesis is:

$$H_0: E_Z( [Y | T = WSH, Z] ) = E_Z( E[Y | T = w, Z] + E[Y | T = s, Z] + E[Y | T = H, Z] )$$

There are theoretical<sup>2-4</sup> and observational<sup>5,6</sup> studies to support this hypothesis, but the only randomized trial to date found no positive interaction between water treatment and handwashing<sup>7</sup> (and, if anything, antagonism, where the effect of the combined treatment is less than the additive effect of water treatment + handwashing).

The second interaction test is whether combined WASH and Nutrition interventions improve our primary outcomes more (or less) than the additive effect of the components delivered separately. The null hypothesis is:

$$H_0: E_Z( E[Y | T = NWSH, Z] ) = E_Z( E[Y | T = WSH, Z] + E[Y | T = N, Z] )$$

While there is biologic plausibility for this interaction, there is scant empirical evidence to support or refute the hypothesis.<sup>8</sup>

### Testing for- and estimating cross-cluster spillovers/externalities

A fundamental assumption for unbiased causal inference in a randomized trial is that the units of randomization are independent.<sup>9</sup> In this study, clusters are the unit of randomization. Cross-cluster spillover effects occur when the treatment assignment of one cluster influences outcomes in another cluster. The mechanism for spillover could be through disease transmission or through information diffusion. Although we expect a priori that cross-cluster spillovers are likely to be quite small, we plan to test this assumption. We plan to test for spillovers over geographic distance and through shared

school membership and market attendance. In the notation below we use distance as an example, but the same parameter and notation applies to spillovers through other channels, which we will test for separately.

Let  $N_d^T$  be the number of treated compounds with treatment  $T$  in some distance  $d$ , defined as straight-line, geographic distance from the cluster perimeter. We do not control  $N_d^T$  by design, but we expect that there will be random variation created by our design. Define a new parameter among the control clusters ( $T=c$ ), which includes the effect of adjacent treated compounds ( $N_d^T$ ) as a measure of the spillover effect, controlling for cluster-level covariates  $X$ :

$$\theta = E_{X,NT} (E[Y|T = c, X, N_d^T] - E[Y|T = c, X, N_d^T = 0])$$

To estimate this parameter, we will need to model  $E[Y | T, X, N_d^T]$ . The linear model used by Miguel and Kremer<sup>10</sup> is a sensible choice, but we may consider less parametric prediction algorithms.<sup>11</sup> To test for cross-cluster spillovers, we will restrict the analysis to the control clusters to simplify the test. The first term is the empirical distribution of  $Y$  in the control group, including observed spillovers ( $N_d^T$ ). The second term is estimated from the predicted values of  $Y$  from the algorithmic fit under conditions of no spillover effects ( $N_d^T=0$ ). (Note: if there are no clusters without spillover effects, the model would need to extrapolate beyond the observed data.) Under the null hypothesis of no spillovers, the parameter equals zero. The null hypothesis is:

$$H_0 : Y \perp N_d^T \mid T, X$$

We can test the null hypothesis with a clustered permutation test for each treatment,  $T$ . This involves permuting the cluster IDs in the control group, re-fitting the algorithm, and re-estimating  $\theta$  for a large number of permutations. This will generate a null distribution of  $\theta$ . We can then obtain a  $P$ -value for the test by comparing the observed  $\theta$  to its null distribution.

If we cannot reject the null hypothesis, then we will proceed with the standard Intention-To-Treat (ITT) analysis (parameters described in the main text). If we reject the null hypothesis, then  $\theta$  will provide an estimate of the magnitude of spillover effects for each treatment  $T$ . In the presence of spillovers the ITT estimates will be a lower bound of the estimate of the total effect of treatment under the assumption that spillover effects are positive.

*Scope:* We plan to test for spillovers in behavior change uptake indicators (Appendix 2) and our primary outcomes. We will repeat the test for each outcome and treatment. We do not expect spillover effects from the nutrition intervention treatment and will not test for them. We will test for spillovers through three main channels:

1. Geographic proximity, with bands ( $d$ ) similar to Miguel and Kremer<sup>10</sup> defined after the baseline survey (not using outcomes) when we have a sense for relevant geographic distances between clusters in each country
2. School attendance
3. Market attendance



To help improve the estimation in all cases, we will attempt collect some measure of total population or compounds in each institution as a variable in  $X$  to control for differences in density.

### Pre-specified subgroup analyses

We recognize that the study is powered to detect main effects on our primary outcomes, and so we will be unlikely to detect subgroup-specific effects unless they are larger than the overall ITT effect.<sup>1</sup> However, we feel that some of the subgroup-specific effects are highly relevant to interpreting the study and to informing intervention targeting in the future. This type of analysis extends the interaction tests between treatments described above by looking at treatment interactions with baseline covariates. For example, the most relevant effect of a water quality intervention is among households who have poor water quality at baseline; it is less likely that a water quality intervention would improve health among children who live in households with microbiologically clean drinking water at baseline.

For all of the subgroup-specific effects that that we plan estimate *a priori* in this study, we will first screen the variables to ensure that there is sufficient variation for the tests to make sense. We will estimate different ITT effects for the different subgroups by interacting subgroup variables with the treatment indicators of interest.<sup>1,12</sup> Within each category of baseline covariates, the country teams have selected characteristics that they will include in subgroup analyses.

#### Household water treatment and quality, source water access and water quality

Rationale: The effect of our drinking water quality intervention may be smaller among households with good baseline drinking water quality. The effect of our other WASH interventions may be greater or smaller, depending on baseline drinking water quality and water source availability. In Kenya, we expect that the majority of our study population will have received a Lifestraw family filter as part of a Vestergaard Frandsen (VF) distribution program throughout Western Province. If the filters are in regular use, we would expect smaller impacts from the chlorine dispenser intervention among those households.

##### Both countries

- Drinking water source (surface water vs. other)
- Household reports regularly treating their drinking water
- Free residual chlorine in stored drinking water

##### Kenya

- Detectable *E. coli* in source water (> 0 CFU / 100 ml)
- Detectable *E. coli* in drinking water (> 0 CFU / 100 ml)
- Field staff observe a VF water filter hanging in the household and household members report frequent use
- Observed VF water filter has visible moisture in it.
- Walking distance in minutes to primary drinking water source

#### Handwashing practices

1  
2  
3 Rationale: The effect of our handwashing intervention may be smaller among  
4 households with good baseline handwashing practices. The effect of our other WASH  
5 interventions may be greater or smaller, depending on baseline handwashing practices.  
6

7  
8 Both countries

- 9 • Mother has clean palms, finger pads, and finger nails

10  
11 Kenya

- 12 • Mother was observed to use soap during a handwashing demonstration
- 13 • Mother lists (unprompted) as critical times for handwashing: before preparing food,  
14 eating, or feeding a child and after defecating or cleaning a child who has defecated.  
15

16  
17 Bangladesh

- 18 • Presence of a handwashing station with water and soap

19  
20  
21 Sanitation conditions

22  
23 Rationale: The effect of our sanitation intervention may be smaller among  
24 households with high levels of baseline sanitation. The effect of our other WASH  
25 interventions may be greater or smaller, depending on baseline sanitation conditions.  
26 For example, an observational study using DHS data documented larger effects of  
27 improved source water only in the presence of improved sanitation conditions.<sup>6</sup>  
28

29  
30 Both countries

- 31 • Household latrine status (none, unimproved, JMP improved)

32  
33 Kenya

- 34 • Stool visible on floor of the latrine
- 35 • Any person in household reported to not always use latrine
- 36 • Most recent feces of child under 36 months were disposed of in latrine
- 37 • Latrine is located in another compound
- 38 • Household already owns potty
- 39 • Cover observed over latrine drop hole

40  
41  
42 Food security

43  
44 Rationale: The effect of our Nutrition intervention or combined Nutrition+WSH  
45 intervention may be greater among households with low food security at baseline.  
46

47  
48 Both countries

- 49 • Questions will be adapted from the Household Food Insecurity and Access Scale  
50 (HFIAS), with modifications for the local language, cultural context, and food  
51 availability patterns.

52  
53 Child age

54  
55 Rationale: All target children will be enrolled in the study while in utero, but their  
56 experience of the intervention will differ slightly depending on their relative age within the  
57 cohort, which will span approximately 6 months of age. Our outcome measurements will  
58  
59  
60

1  
2  
3 take place at a fixed calendar time – not child age. It is possible that younger children  
4 will benefit more from being born into more mature intervention conditions. A competing  
5 hypothesis is that the younger children will benefit less from intervention because they  
6 will have had less post-natal exposure compared to older children.  
7

8  
9 Both countries

- 10 • Stratify the results by age in 3-month brackets at the endline survey: [18,21), [21,  
11 24), [24, 27)

### 12 13 Child sex

14  
15 Rationale: Biologic differences, cultural practices, or behavioral practices may modify  
16 the effect of the interventions with respect to boys or girls.  
17

18  
19 Both countries

- 20 • Stratify the results by sex

### 21 22 Number of older children living in the compound

23  
24 Rationale: Children living in compounds with older children may be at higher risk for  
25 pathogen transmission into the compound. Older children have greater exposure  
26 through schools and social networks, and if they do not use latrines they may have  
27 greater pathogen shedding in the compound through open defecation.  
28

29  
30 Both countries

- 31 • Stratify the results by the number of older children (<15 years old) in the compound.

### 32 33 Cluster density and cluster size

34  
35 Rationale: The positive or negative effects of proximate neighbors may modify the  
36 protective effects of the intervention. For negative spillover effects, like disease  
37 transmission, we would expect the interventions to be less efficacious in densely  
38 populated environments than in more sparsely populated environments. In Kenya, where  
39 cluster sizes vary, is possible that the intervention effects will be heterogeneous with  
40 cluster size because the number of treated households per intervention promoter may  
41 change the nature of the promotion.  
42

43  
44 Both countries

- 45 • Stratify the results into clusters of high compound density and low compound  
46 density.

47  
48 Kenya only

- 49 • Stratify the results by the number of households per promoter in the cluster.

### 50 51 Maternal intelligence and education

52  
53 Rationale: mothers who are better educated and/or perform better on literacy tests  
54 may be more capable of adapting to new information and technology. They may have  
55 greater ability to optimize their behavior to take advantage of the messages and  
56 materials that the study provides.  
57  
58  
59  
60

## Both countries

- Mothers that score in the top 25<sup>th</sup> percentile of the study population on at least one of the maternal intelligence tests that we administer at the 1-year follow-up survey
- Maternal schooling attainment

## Kenya

- Maternal self-reported literacy

**Appendix References**

- 1 Brookes ST, Whitely E, Egger M, *et al*. Subgroup analyses in randomized trials: risks of subgroup-specific analyses; power and sample size for the interaction test. *J Clin Epidemiol* 2004;**57**:229–36.
- 2 Briscoe J. Intervention studies and the definition of dominant transmission routes. *Am J Epidemiol* 1984;**120**:449–55.
- 3 VanDerslice J, Briscoe J. Environmental interventions in developing countries: interactions and their implications. *Am J Epidemiol* 1995;**141**:135–44.
- 4 Eisenberg JNS, Scott JC, Porco T. Integrating disease control strategies: balancing water sanitation and hygiene interventions to reduce diarrheal disease burden. *Am J Public Health* 2007;**97**:846–52.
- 5 Esrey SA, Habicht JP, Casella G. The complementary effect of latrines and increased water usage on the growth of infants in rural Lesotho. *Am J Epidemiol* 1992;**135**:659–66.
- 6 Esrey SA. Water, waste, and well-being: a multicountry study. *Am J Epidemiol* 1996;**143**:608–23.
- 7 Luby SP, Agboatwalla M, Painter J, *et al*. Combining drinking water treatment and hand washing for diarrhoea prevention, a cluster randomised controlled trial. *Trop Med Int Health* 2006;**11**:479–89.
- 8 Dewey KG, Mayers DR. Early child growth: how do nutrition and infection interact? *Matern Child Nutr* 2011;**7 Suppl 3**:129–42.
- 9 Holland PW. Statistics and Causal Inference. *J Am Stat Assoc* 1986;**81**:945–60.
- 10 Miguel E, Kremer M. Worms: Identifying impacts on education and health in the presence of treatment externalities. *Econometrica* 2004;**72**:159–217.
- 11 Van der Laan MJ, Polley EC, Hubbard AE. Super learner. *Stat Appl Genet Mol Biol* 2007;**6**:Article 25.
- 12 Pocock SJ, Assmann SE, Enos LE, *et al*. Subgroup analysis, covariate adjustment and baseline comparisons in clinical trial reporting: current practice and problems. *Stat Med* 2002;**21**:2917–30.

1  
2  
3  
4  
5  
6  
7  
8  
9  
10  
11  
12  
13  
14  
15  
16  
17  
18  
19  
20  
21  
22  
23  
24  
25  
26  
27  
28  
29  
30  
31  
32  
33  
34  
35  
36  
37  
38  
39  
40  
41  
42  
43  
44  
45  
46  
47  
48  
49  
50  
51  
52  
53  
54  
55  
56  
57  
58  
59  
60

For peer review only

Cluster-randomized controlled trials of individual and combined water, sanitation, hygiene, and nutritional interventions in rural Bangladesh and Kenya: The WASH Benefits Study design and rationale

CONSORT Checklist for the protocol (excluding Results and Discussion)

BMJ 2012;345:e5661 doi: 10.1136/bmj.e5661

| ITEM                      | DESCRIPTION                                                                                                                                                                  | REPORTED IN SECTION                                                                            |
|---------------------------|------------------------------------------------------------------------------------------------------------------------------------------------------------------------------|------------------------------------------------------------------------------------------------|
| <b>Title and Abstract</b> |                                                                                                                                                                              |                                                                                                |
| 1a                        | Identification as a cluster randomised trial in the title                                                                                                                    | Title                                                                                          |
| 1b                        | Structured summary of trial design, methods, results, and conclusions                                                                                                        | Abstract                                                                                       |
| <b>Introduction</b>       |                                                                                                                                                                              |                                                                                                |
| Background and Objectives |                                                                                                                                                                              |                                                                                                |
| 2a                        | Scientific background and explanation of rationale; Rationale for using a cluster design                                                                                     | Introduction, Methods and Analysis                                                             |
| 2b                        | Specific objectives or hypotheses; Whether objectives pertain to the cluster level, the individual participant level, or both                                                | Introduction, Methods and Analysis: Overview of the design                                     |
| <b>Methods</b>            |                                                                                                                                                                              |                                                                                                |
| Trial design:             |                                                                                                                                                                              |                                                                                                |
| 3a                        | Description of trial design (such as parallel, factorial) including allocation ratio; definition of cluster and description of how the design features apply to the clusters | Methods and Analysis: Overview of the design                                                   |
| 3b                        | Important changes to methods after trial commencement (such as eligibility criteria), with reasons                                                                           | N/A                                                                                            |
| Participants              |                                                                                                                                                                              |                                                                                                |
| 4a                        | Eligibility criteria for participants; Eligibility criteria for clusters                                                                                                     | Methods and Analysis: Participant eligibility criteria, study setting, and enrollment strategy |
| 4b                        | Settings and locations where the data were collected                                                                                                                         | Methods and Analysis: Participant eligibility criteria, study setting, and enrollment strategy |
| Interventions             |                                                                                                                                                                              |                                                                                                |
| 5                         | The interventions for each group with                                                                                                                                        | Methods and Analysis:                                                                          |

| ITEM                              | DESCRIPTION                                                                                                                                                                                                                                                                                                                                                                              | REPORTED IN SECTION                                           |
|-----------------------------------|------------------------------------------------------------------------------------------------------------------------------------------------------------------------------------------------------------------------------------------------------------------------------------------------------------------------------------------------------------------------------------------|---------------------------------------------------------------|
|                                   | sufficient details to allow replication, including how and when they were actually administered; Whether interventions pertain to the cluster level, the individual participant level, or both                                                                                                                                                                                           | Description of the interventions<br>Appendix 1                |
| Outcomes                          |                                                                                                                                                                                                                                                                                                                                                                                          |                                                               |
| 6a                                | Completely defined prespecified primary and secondary outcome measures, including how and when they were assessed; whether outcome measures pertain to the cluster level, the individual participant level, or both                                                                                                                                                                      | Methods and Analysis:<br>Outcomes<br>Appendix 2<br>Appendix 3 |
| 6b                                | Any changes to trial outcomes after the trial commenced, with reasons                                                                                                                                                                                                                                                                                                                    | N/A                                                           |
| Sample Size                       |                                                                                                                                                                                                                                                                                                                                                                                          |                                                               |
| 7a                                | How sample size was determined                                                                                                                                                                                                                                                                                                                                                           | Methods and Analysis:<br>Sample Size<br>Appendix 4            |
| 7b                                | When applicable, explanation of any interim analyses and stopping guidelines                                                                                                                                                                                                                                                                                                             | Methods and Analysis:<br>Analysis Plan, Interim analyses      |
| <b>Randomisation</b>              |                                                                                                                                                                                                                                                                                                                                                                                          |                                                               |
| Sequence generation               |                                                                                                                                                                                                                                                                                                                                                                                          |                                                               |
| 8a                                | Method used to generate the random allocation sequence                                                                                                                                                                                                                                                                                                                                   | Methods and Analysis:<br>Randomization and Blinding           |
| 8b                                | Type of randomisation; details of any restriction (such as blocking and block size); Details of stratification or matching if used                                                                                                                                                                                                                                                       | Methods and Analysis:<br>Randomization and Blinding           |
| Allocation concealment mechanism: |                                                                                                                                                                                                                                                                                                                                                                                          |                                                               |
| 9                                 | Mechanism used to implement the random allocation sequence (such as sequentially numbered containers), describing any steps taken to conceal the sequence until interventions were assigned; specification that allocation was based on clusters rather than individuals and whether allocation concealment (if any) was at the cluster level, the individual participant level, or both | Methods and Analysis:<br>Randomization and Blinding           |
| Implementation:                   |                                                                                                                                                                                                                                                                                                                                                                                          |                                                               |
| 10a                               | Who generated the random allocation                                                                                                                                                                                                                                                                                                                                                      | Methods and Analysis:                                         |

| ITEM                 | DESCRIPTION                                                                                                                                                        | REPORTED IN SECTION                                                                            |
|----------------------|--------------------------------------------------------------------------------------------------------------------------------------------------------------------|------------------------------------------------------------------------------------------------|
|                      | sequence, who enrolled clusters, and who assigned clusters to interventions                                                                                        | Randomization and Blinding                                                                     |
| 10b                  | Mechanism by which individual participants were included in clusters for the purposes of the trial (such as complete enumeration, random sampling)                 | Methods and Analysis: Participant eligibility criteria, study setting, and enrollment strategy |
| 10c                  | From whom consent was sought (representatives of the cluster, or individual cluster members, or both) and whether consent was sought before or after randomisation | Methods and Analysis: Participant eligibility criteria, study setting, and enrollment strategy |
| Blinding             |                                                                                                                                                                    |                                                                                                |
| 11a                  | If done, who was blinded after assignment to interventions (for example, participants, care providers, those assessing outcomes) <input type="checkbox"/> and how  | Methods and Analysis: Randomization and Blinding                                               |
| 11b                  | if relevant, description of the similarity of interventions                                                                                                        | N/A                                                                                            |
| Statistical methods: |                                                                                                                                                                    |                                                                                                |
| 12a                  | Statistical methods used to compare groups for primary and secondary outcomes; How clustering was taken into account                                               | Methods and Analysis: Analysis Plan                                                            |
| 12b                  | Methods for additional analyses, such as subgroup analyses and adjusted analyses                                                                                   | Methods and Analysis: Analysis Plan Appendix 5                                                 |
